# Supplementary material for: Multilocus sequence typing of diverse phytoplasmas using hybridization probe-based sequence capture provides high resolution strain differentiation
Source: Frontiers journal article supplement (doi:10.3389/fmicb.2022.959562), 2022-09-29
Supplement: Table_2.XLS [file Table_2.XLS]

## Sheet: Probes
SequenceName	Sequence	Chromosome	Start	Stop	Orientation	Group Name	Request ID	GC Percent
619943_24243589_16SrI-ny1_16S-23S_1_1	AAGAGTTTGATCCTGGCTCAGGATTAACGCTGGCGGCGTGCCTAATACATGCAAGTCGAACGGAAGTTTAAGCAATTAAACTTTAGTGGCGAACGGGTGAGTAACGCGTAAGCAATCTGC		0	120	-	16SrI-ny1_16S-23S	619943	47.5
619943_24243589_16SrI-ny1_16S-23S_1_2	ATCTGCCCCTAAGACGAGGATAAAAGTTGGAAACGACTGCTAAGACTGGATAGGAGACAAGAGGGCATCTTCTTGTTTTTAAAAGACCTAGCAATAGGTATGCTTAGGGAGGAGCTTGCG		114	234	-	16SrI-ny1_16S-23S	619943	45
619943_24243589_16SrI-ny1_16S-23S_1_3	CTTGCGTCACATTAGTTAGTTGGTGGGGTAAAGGCCTAACAAGACTATGATGTGTAGCCGGGCTGAGAGGTTGAACGGCCACATTGGGACTGAGACACGGCCCAAACTCCTACGGGAGGC		228	348	-	16SrI-ny1_16S-23S	619943	54.17
619943_24243589_16SrI-ny1_16S-23S_1_4	GGAGGCAGCAGTAGGGAATTTTCGGCAATGGAGGAAACTCTGACCGAGCAACGCCGCGTGAACGATGAAGTATTTCGGTACGTAAAGTTCTTTTATTAGGGAAGAATAAATGATGGAAAA		342	462	-	16SrI-ny1_16S-23S	619943	44.17
619943_24243589_16SrI-ny1_16S-23S_1_5	GGAAAAATCATTCTGACGGTACCTAATGAATAAGCCCCGGCTAACTATGTGCCAGCAGCCGCGGTAATACATAGGGGGCAAGCGTTATCCGGAATTATTGGGCGTAAAGGGTGCGTAGGC		456	576	-	16SrI-ny1_16S-23S	619943	50.83
619943_24243589_16SrI-ny1_16S-23S_1_6	GTAGGCGGTTAAATAAGTTTATGGTCTAAGTGCAATGCTCAACATTGTGATGCTATAAAAACTGTTTAGCTAGAGTAAGATAGAGGCAAGTGGAATTCCATGTGTAGTGGTAAAATGCGT		570	690	-	16SrI-ny1_16S-23S	619943	37.5
619943_24243589_16SrI-ny1_16S-23S_1_7	ATGCGTAAATATATGGAGGAACACCAGTAGCGAAGGCGGCTTGCTGGGTCTTTACTGACGCTGAGGCACGAAAGCGTGGGGAGCAAACAGGATTAGATACCCTGGTAGTCCACGCCGTAA		684	804	-	16SrI-ny1_16S-23S	619943	52.5
619943_24243589_16SrI-ny1_16S-23S_1_8	CCGTAAACGATGAGTACTAAACGTTGGGTAAAACCAGTGTTGAAGTTAACACATTAAGTACTCCGCCTGAGTAGTACGTACGCAAGTATGAAACTTAAAGGAATTGACGGGACTCCGCAC		798	918	-	16SrI-ny1_16S-23S	619943	43.33
619943_24243589_16SrI-ny1_16S-23S_1_9	CCGCACAAGCGGTGGATCATGTTGTTTAATTCGAAGGTACCCGAAAAACCTCACCAGGTCTTGACATGCTTCTGCAAAGCTGTAGAAACACAGTGGAGGTTATCAGTTGCACAGGTGGTG		912	1032	-	16SrI-ny1_16S-23S	619943	48.33
619943_24243589_16SrI-ny1_16S-23S_1_10	GTGGTGCATGGTTGTCGTCAGCTCGTGTCGTGAGATGTTGGGTTAAGTCCCGCAACGAGCGCAACCCTTATTGTTAGTTACCAGCACGTAATGGTGGGGACTTTAGCAAGACTGCCAGTG		1026	1146	-	16SrI-ny1_16S-23S	619943	52.5
619943_24243589_16SrI-ny1_16S-23S_1_11	CCAGTGATAAATTGGAGGAAGGTGGGGACGACGTCAAATCATCATGCCCCTTATGACCTGGGCTACAAACGTGATACAATGGCTGTTACAAAGGGTAGCTGAAGCGCAAGTTTTTGGCGA		1140	1260	-	16SrI-ny1_16S-23S	619943	48.33
619943_24243589_16SrI-ny1_16S-23S_1_12	TGGCGAATCTCAAAAAAACAGTCTCAGTTCGGATTGAAGTCTGCAACTCGACTTCATGAAGTTGGAATCGCTAGTAATCGCGAATCAGCATGTCGCGGTGAATACGTTCTCGGGGTTTGT		1254	1374	-	16SrI-ny1_16S-23S	619943	45.83
619943_24243589_16SrI-ny1_16S-23S_1_13	GTTTGTACACACCGCCCGTCAAACCACGAAAGTTGGCAATACCCAAAGCCGGTGGCCTAACTTCGCAAGAAGAGGGAACCGTCTAAGGTAGGGTCGATGATTGGGGTTAAGTCGTAACAA		1368	1488	-	16SrI-ny1_16S-23S	619943	50.83
619943_24243589_16SrI-ny1_16S-23S_1_14	TAACAAGGTATCCCTACCGGAAGGTGGGGATGGATCACCTCCTTTCTAAGGAAACAATTATCATCTTCAGTTTTGAGAGACTTAAGAAAGTTTTTCATTGTCACTTGCTTGCAAATTGTA		1482	1602	-	16SrI-ny1_16S-23S	619943	38.33
619943_24243589_16SrI-ny1_16S-23S_1_15	ATTGTATTTGCAACATTTTAATCTTTTTAAGATTAAGGGCCTATAGCTCAGTTGGTTAGAGCACACGCCTGATAAGCGTGAGGTCGGTGGTTCAAGTCCATTTAGGCCCACCATAACCAC		1596	1716	-	16SrI-ny1_16S-23S	619943	42.5
619943_24243589_16SrI-ny1_16S-23S_1_16	AACCACAAATAGGCAAAATCTTAAAAAAGCTCTTTGAAAAGTAGATAAACGAAGGTTAAAAAATCAAAGGAACTAAGGGCGCACAGTGGATGCCTTGGCACTAAGAGCCGATGAAGGACG		1710	1830	-	16SrI-ny1_16S-23S	619943	40
619943_24243590_16SrI-TW1_cpn60_1_1	ATGAGTAAAAAAATACTTTATGGCAAAGAAGCAAGAAAAGCTTTATTACAAGGAGTAGATGCAATTGCAAATACTGTTAAAGTGACTTTAGGACCTAAAGGACGTAATGTTATTTTAGAA		0	120	-	16SrI-TW1_cpn60	619943	30
619943_24243590_16SrI-TW1_cpn60_1_2	TAGAAAAAGCCTATGATTCACCTGCTATTGTAAATGATGGTGTTTCTATTGCTAAAGAAATTGAATTAAAAAATCCTTATCAAAATATGGGAGCAAAGTTAGTATATGAAGTAGCTTCCA		115	235	-	16SrI-TW1_cpn60	619943	30
619943_24243590_16SrI-TW1_cpn60_1_3	TTCCAAAACTAACGATAAAGCAGGAGATGGAACAACTACAGCAACTGTTTTGGCACAAAGTATGATTCATCGTGGGTTTGATGCAATTGATGCAGGAGCTAATCCTGTTTTAGTAAAAGA		230	350	-	16SrI-TW1_cpn60	619943	38.33
619943_24243590_16SrI-TW1_cpn60_1_4	AAAGAAGGAATTGAGTTAGCTGCATTAACAGTTGCCAAAAAACTTTTAGCTAAATCTAAAAAAGTAGACGCCCAAGAAGATATTCAAAATGTGGCTGCTGTTTCATCAGGTAGTCAAGAA		345	465	-	16SrI-TW1_cpn60	619943	35
619943_24243590_16SrI-TW1_cpn60_1_5	AAGAAATTGGTAAAATCATTGCCCAAGCGATGCAAAAAGTAGGAAAAGATGGAGTTATTAATGTTGATGAATCCAAAGGTTTTGAAACAGAATTAGAAGTTGTTGAAGGATTGCAGTACG		460	580	-	16SrI-TW1_cpn60	619943	34.17
619943_24243590_16SrI-TW1_cpn60_1_6	GTACGATAAAGGATATGCTTCTCCTTATTTTGTCTCTGATAGAGAAAGTATGACAGTACAGTTAGAAAATGCGTTAGTTTTAGTAACTGATCATAAAATTAGTACTGTGCAAGAAATTGT		575	695	-	16SrI-TW1_cpn60	619943	31.67
619943_24243590_16SrI-TW1_cpn60_1_7	ATTGTACCTATTTTGGAAGAAGTAGTAAAAGCATCTAGACCTTTATTAATTGTAGCTGAAGCTGTGGAAAATGAAGTTTTAGGGGTTTTGGTAGCTAATAAATTAAGAGGAACTTTTAAT		690	810	-	16SrI-TW1_cpn60	619943	30.83
619943_24243590_16SrI-TW1_cpn60_1_8	TTAATGTAGTTGTAACTAATGCTCCTGGTTTTGGTGATAATCAAAAAGAAATGTTACAAGATATTGCAGTACTTACAAAAGCTAATTTTGTTTCTAAAGAACTTAATATGAAATTAGCAG		805	925	-	16SrI-TW1_cpn60	619943	27.5
619943_24243590_16SrI-TW1_cpn60_1_9	AGCAGATTTAAAAATGGATGATTTAGGAAATATCAATAAAGCTATTATTAAAAAAGATAATACTACTTTGATAAGTAATTCTAAAAGTCCTGAATTAGAAAAACGTATTCAAGTATTAAA		920	1040	-	16SrI-TW1_cpn60	619943	21.67
619943_24243590_16SrI-TW1_cpn60_1_10	TTAAAAACTCAAATTAAAAATGCTACTTCTGATTATGAAACTAAAAATTTGCAAGAAAGATTAGCTAAATTATCAGGAGGAGTTGCCTTAATTAAAGTTGGGGCTGCAACTGATACTGAA		1035	1155	-	16SrI-TW1_cpn60	619943	30
619943_24243590_16SrI-TW1_cpn60_1_11	CTGAATTAAAAGATAAAAAATTACGTATTGAAGATGCTCTTAATGCTACTAAAGCTGCTATTACTGAAGGAATTGTAGTTGGTGGTGGAAAAGCTTTAGTTGAGGTTTATCAAGAATTAA		1150	1270	-	16SrI-TW1_cpn60	619943	30.83
619943_24243590_16SrI-TW1_cpn60_1_12	ATTAAAAGATACTTTGGTATCTGATAATAAAGAAGTACAACAAGGAATTGATGTAGTAGTACAAAGTCTTTTAGTACCTACTTATCAAATTGCTTATAATGCAGGATTTTCAGGTAAAGA		1265	1385	-	16SrI-TW1_cpn60	619943	28.33
619943_24243590_16SrI-TW1_cpn60_1_13	AAAGATGTGGTAAAACAACAACTTTTACAACCCTTAAATTTTGGGTTTAATGCTAAAGAAGGTAAGTATGTTTGTCTCTTAAAAGAAGGTATAATTGACCCTACTAAAGTAACTCGTCAA		1380	1500	-	16SrI-TW1_cpn60	619943	30.83
619943_24243590_16SrI-TW1_cpn60_1_14	GTCAAGCTGTTCTTAATGCTGCTTCTATCTCTGCTTTGATGATTACAACTGAGGCTGCTGTGGTAAGTTTGAAAGAAAATAAAGATAATAACTTTGATTTAGGAACACAAGAATAA		1495	1611	-	16SrI-TW1_cpn60	619943	33.62
619943_24243591_16SrI-TW1_tuf_1_1	ATGGCTAATGAAAAATTTATACGAAACAAACCGCATTTAAATGTAGGTACTATTGGACACGTAGACCACGGTAAAACTACTCTTACAGCAGCTATTACCCAAGTTTTGTCTACTCGTGGA		0	120	-	16SrI-TW1_tuf	619943	37.5
619943_24243591_16SrI-TW1_tuf_1_2	GATTGGCTAAAAGTAGAGCTTATGATCAAATTGATAATGCTCCTGAAGAAAGAGAACGTGGAATCACTATTAAAACTTCACACGTAGAATATGAAACAGAAAAACGTCACTATGCTCACG		118	238	-	16SrI-TW1_tuf	619943	35.83
619943_24243591_16SrI-TW1_tuf_1_3	CGTTGACTGTCCTGGACACGCCGATTATGTTAAAAACATGATTACTGGTGCTGCTCAAATGGATGCTGCTATTTTAGTTGTTTCTGGTGCAGATAGTGTTATGCCTCAAACTAGAGAACA		236	356	-	16SrI-TW1_tuf	619943	41.67
619943_24243591_16SrI-TW1_tuf_1_4	CACATTTTATTAGCGCGCCAAGTTGGTGTTCCAAAAATTGTTGTTTTCTTAAATAAATGTGATCTTTCCCCAGACGAACAAATTTTAGAATTAGTAGAAATGGAAGTTCGTGAATTATTA		354	474	-	16SrI-TW1_tuf	619943	31.67
619943_24243591_16SrI-TW1_tuf_1_5	TATCTCAATACGATTTCCCAGGAGACGACATTCCTGTTATTAGAGGATCTGCATTAAAAGCTTTAGAAGGTGACGCTCATTACGTTGCTCAAGTAAACGAATTAATCGAAACTCTAGACA		472	592	-	16SrI-TW1_tuf	619943	38.33
619943_24243591_16SrI-TW1_tuf_1_6	CACCTACATTGAAGACCCGGTGCGCGAAGTTGACAAACCTTTCTTAATGCCTGTAGAAGATGTTTTCACTATTACTGGTAGAGGAACTGTTGTTACTGGTAGAGTAGAAAGAGGTCAAGT		590	710	-	16SrI-TW1_tuf	619943	42.5
619943_24243591_16SrI-TW1_tuf_1_7	GTAAAAGCTGGTGATGAAGTAGAAATCGTAGGACTTAAAGAAACTAGAAAAACTATTGTAACTGCAGTAGAAATGTTTAAAAAAGACCTAGATTTTGCTCAAGCAGGAGACAACGTTGGA		708	828	-	16SrI-TW1_tuf	619943	35
619943_24243591_16SrI-TW1_tuf_1_8	GAGCTTTATTACGTGGAATTAACCGTGAAGACGTACAACGTGGACAAGTTTTAGCTAAACCAGGTTCTGTTAAGCCTCATTCTAAATTTGTTGCTCAAGTTTATGTTTTAACTAAAGAAG		826	946	-	16SrI-TW1_tuf	619943	35.83
619943_24243591_16SrI-TW1_tuf_1_9	AGAAGGAGGACGTCACACTGCCTTTTTCTCTCAATACCGTCCTCAATTCTATTTCCGTACTACAGATATTACAGGAGTAGTTGAATTACAAGGTGATGTTAAAATGGTAATGCCAGGTGA		944	1064	-	16SrI-TW1_tuf	619943	40
619943_24243591_16SrI-TW1_tuf_1_10	GACAACGCTGAATTAGTAGTTACCCTTAACAACCCAATTGCTATCGAAGAAGGAACTAAATTTTCTATTCGTGAAGGTGGAAAAACAGTTGGTGCAGGATCAGTTTCCAAACTTCTTAAC		1062	1182	-	16SrI-TW1_tuf	619943	38.33
619943_24243592_16SrI-canola_secY_1_1	AGATGAAACGTCAATTAAAATTAGTTTTAGGCAATCGTAAATTAATGTTTCAAATCTTTTTTACCTTATTTATTATTTCTATTGTTTGTTTAGGAACTTCTTGGCCTCTTCCTTTTATTA		0	120	-	16SrI-canola_secY	619943	25
619943_24243592_16SrI-canola_secY_1_2	TATTAATACTAAATCCCTTGATTTGTCCAAACTTTTTGGGGTTTTTTCCATAAATGCTGGTACTCTTTTTGGATTGGGAATCACTCCTTACATCACTGCTTCCATTGTAGTGCAATTTTT		115	235	-	16SrI-canola_secY	619943	34.17
619943_24243592_16SrI-canola_secY_1_3	TTTTTGCAAAAACTTCTTCCTATTTGTCGCGAATGGAAAGACCAAGGACAAATGGGCAAACGCAAACTTAATCTTTTAACACGTAGTCTTGCCTTATTGTTTGCTTTTGGGCAATCTTTT		230	350	-	16SrI-canola_secY	619943	36.67
619943_24243592_16SrI-canola_secY_1_4	CTTTTGCTTTTTTGAACAGTTATTCAAAACTTTTTGTCACATCAATAAGTACAAGCCAACTGTTTTTGTTAGCTTTAATTGCTACTGCAGGAGTTGCTATTTTAATTTGGTTTGCTGACC		345	465	-	16SrI-canola_secY	619943	32.5
619943_24243592_16SrI-canola_secY_1_5	TGACCTTATCAATTCCAAAGGTATTGGAAACGGGACTTCTATTTTAATTGTTGTTTCGATGAGCCACAGCCTAATTAATCTATTTGTAAATCTGAACGAATCATATTTATCTCAAAACAA		460	580	-	16SrI-canola_secY	619943	31.67
619943_24243592_16SrI-canola_secY_1_6	AACAATTTTTTAACTTTGAAAACTTTTAATTTTGCATGTATTGTTCTTTTACTTCTCTTATTTTTAATTTTTACTGTAGTTGTGCAAATAACATCTTTAAAAATACCTATCAATTATGCG		575	695	-	16SrI-canola_secY	619943	21.67
619943_24243592_16SrI-canola_secY_1_7	ATGCGCGCAATCAAGTGCAAGGGAAAAGCTACATTCCATTAAAAATTAATAGTGCAGGAGTTATGCCAGTTATTTTGGCATCTGCTTTATTGCAACCTTTCCAGATGTTAGCAGGAGTTA		690	810	-	16SrI-canola_secY	619943	39.17
619943_24243592_16SrI-canola_secY_1_8	AGTTATTGGGAATACAAAATTTACAGAATTAGTAGATTTTTTTGCCAAAACTAACTTTCCTGAAAACCAAATTAACTTTTTTGCCATAGGCTTTTTAGTCTTGTTAGTAATTGTTTTTTC		805	925	-	16SrI-canola_secY	619943	26.67
619943_24243592_16SrI-canola_secY_1_9	TTTTCTTTCTTTTCTGCTTTTATGAATGTCAATCCTGAAGATATTTCAGAACATTTATCCAAACAAGATGCCTATATTGCAGGTTTAAGACCAGGTGAACAAACTACTCGTTATTTAGCT		920	1040	-	16SrI-canola_secY	619943	32.5
619943_24243592_16SrI-canola_secY_1_10	TAGCTAATACCTTATTTAAAATCACTGTTTTAGGAACTGTTTTTATTGCTGCTCTTGTTGTAACACCTATTCTTATGGAACATTTTTTAGGTTTGAAAGATATGAAATTAGGAGGAACCA		1035	1155	-	16SrI-canola_secY	619943	30
619943_24243592_16SrI-canola_secY_1_11	AACCAGTTTGCTTATTATTGTTAGTGTAGCCCTTGAAACTATCCAACGCATCAAAGCTACTGCCAACAAAAAAGAATATCAAAAATTATTTTAATTAAGCAAACAAGACAATATGAT		1150	1267	-	16SrI-canola_secY	619943	29.91
619943_24243593_16SrI-TW1_secA_1_1	ATGTTAAATTTTTTAAAAAAAATATTTAATTCTTCCAAAAAAGCTTTAAGAAAAGCTAGAACCATAGCTAATAAAGTACAAAATTTAGAAGCCCAAATGGCTTTATTAGATGACAAAGAT		0	120	-	16SrI-TW1_secA	619943	23.33
619943_24243593_16SrI-TW1_secA_1_2	TTTTGCCACAAAAACCGCAGAATTAAAAAAACTCTTTCAAGAAGGAAAAACCCTTAACCAACTGCTGCCCGAAGCCTATGCTCTTGCCAAAGAAGCTACCAAAAGAGTAACAGGACTTAC		119	239	-	16SrI-TW1_secA	619943	40.83
619943_24243593_16SrI-TW1_secA_1_3	CTCCTTATTACGTTCAAATTTTGGGCGCTGTAATTTTGCATCAAGGAAATATTTCTGAGATGAAAACTGGGGAAGGAAAAACCCTTACTGCCATCATGCCTGCTTATCTTAACGCTTTAA		238	358	-	16SrI-TW1_secA	619943	38.33
619943_24243593_16SrI-TW1_secA_1_4	AGTGGTAACCCTGTTCACATTGTTACAGTCAATGAATACCTAGCTAAAAGAGAATTTGAAGGTAGCATCGGTGATGTTTTTCGCTTTTTGGGAATGACAGTAGGACTTAATACCAAAGAC		357	477	-	16SrI-TW1_secA	619943	38.33
619943_24243593_16SrI-TW1_secA_1_5	CAAAGACCACGCACAAAAACAACAAGCCTATTTATGTGATATTCTCTACACTACTAACAGTGAATTAGGGTTTGATTATTTAAGAGACAACATGGAAATTGAAGCTTCCAATTTGGTAAT		476	596	-	16SrI-TW1_secA	619943	33.33
619943_24243593_16SrI-TW1_secA_1_6	TGAAACGCCCTTACAGTTATGCTATTGTTGATGAAGTAGACTCTATTTTAATTGATGAGGCAAGAACGCCTTTAATTATTTCCCAAAGTGTCAAAGAAACTAAGAATTTATACAAAGAAG		595	715	-	16SrI-TW1_secA	619943	32.5
619943_24243593_16SrI-TW1_secA_1_7	GCACAACGTTTTGTTCGCACCCTTAAAAATAGACATTATCTTATTGAATTAGAAACTAAAACAATTGAACTTACCGAAGAAGGAATTACCAAAGCTGAAAACTTTTTCCAAATTGATAAT		714	834	-	16SrI-TW1_secA	619943	30
619943_24243593_16SrI-TW1_secA_1_8	TTTATACAACGTAGAACACGCCTCTTTGCTCCACCATGTCAAAAACGCCCTTAAAGCAGCTTTTACGATGCACAAAAACAAAGATTACTTAGTTGATTACAAAGATGGACAAGTTCTAAT		833	953	-	16SrI-TW1_secA	619943	36.67
619943_24243593_16SrI-TW1_secA_1_9	TTATTGATCAATTTACTGGACGTGCTTTGCCAGGACGCCAATTTAGCGACGGTCTTCACCAAGCATTAGAAGCCAAAGAAGGAGTATTAATTAAAGAAGAAACTTCCATTGGAGCTACTA		952	1072	-	16SrI-TW1_secA	619943	40
619943_24243593_16SrI-TW1_secA_1_10	ATTACTTATCAAAATTTTTTCCGTCTTTATCACAAATTATCAGGGATGACAGGAACTGCCAAAACCGAAGAAGATGAATTTAGAGACATTTATAACATGGAAGTTATCGAAATTCCTACC		1071	1191	-	16SrI-TW1_secA	619943	32.5
619943_24243593_16SrI-TW1_secA_1_11	CAATGTTCCTATGATAAGAATTGACGAGCCCGATTTTATTTTTGTTTCTTTAAAAGAAAAATACGACGCTTTAATTGAAGAAATAACTTCTCGCCACAAAAAAAGACAACCCATTTTAAT		1190	1310	-	16SrI-TW1_secA	619943	30
619943_24243593_16SrI-TW1_secA_1_12	TTGGGACAACTACAGTAGAAGTTTCTGAAATTATTTCTAAAAAATTAAAAAAACATTCCATTAAACACGAAATTCTAAATGCCAAAAACCACTCTAAAGAAGCAGACATCATTGCTAAGG		1309	1429	-	16SrI-TW1_secA	619943	30
619943_24243593_16SrI-TW1_secA_1_13	GCAGGACTTAAAAATGCAGTTACTATTGCTACTAATATGGCAGGACGTGGAACTGATATTCGTTTAGGCGAAGGGGTTAAAGAATTAGGCGGACTTGCTGTTTTAGGTACTGAAAGACAC		1428	1548	-	16SrI-TW1_secA	619943	41.67
619943_24243593_16SrI-TW1_secA_1_14	CGAATCACGAAGAATTGATAACCAATTAAGAGGACGTGCTGGACGTCAAGGCGACCCTGGTTATTCACGTTTTTTTATTTCTAGCGAAGATGAACTTGCCCAAAGATTTGGTGGCACTAG		1547	1667	-	16SrI-TW1_secA	619943	43.33
619943_24243593_16SrI-TW1_secA_1_15	GAATAGAAAAAATTATTTCTTTGCTCCAAAAAATAAGCGATTCCGAAACTAAAACTTCATCTAAAATGGTGACTAAATTTTTTACCAAAATACAAAAAAAAGTAGAATCTTCCAATTTTG		1666	1786	-	16SrI-TW1_secA	619943	25
619943_24243593_16SrI-TW1_secA_1_16	GACTATCGTAAATACCTCTTAAAATATGATGATATTTTACGTATTCAAAGAGAAATTATCTATAACCAAAGAAAAGAAATTCTAGTTAGCAATAGAGTAGAACAAATCGTTCAAGATTTA		1785	1905	-	16SrI-TW1_secA	619943	25.83
619943_24243593_16SrI-TW1_secA_1_17	AATGCAAAAGACCCTTAATAAAGCTATTTTGCCACATTTTACTAACAACCCTACCCAATGTCAAACCCAAACTTTAATTACTTTTTTAGAAAATAAATTTTTCCCTAAACAAACCTTTGA		1904	2024	-	16SrI-TW1_secA	619943	29.17
619943_24243593_16SrI-TW1_secA_1_18	ATTTAGAAGAAGTACAAGAATTATGCAACAACCCTAAAACAAACTCCCTTGATTCTTTTCAACAACATTTATTGCAAAAAGTAAAAGCCACTTTACAATCTCAAAAAGATTTTTTTGAAA		2023	2143	-	16SrI-TW1_secA	619943	27.5
619943_24243593_16SrI-TW1_secA_1_19	AAAGACCCTGATAAAGCTCAATATTTTGCAAAAGGTCTTAAATGGATTACATTAAAAATAATTGATAATTACTACCAACGCCACATCAATGACATGAGTTCTTTAAGACAAGGAATTGGA		2142	2262	-	16SrI-TW1_secA	619943	30.83
619943_24243593_16SrI-TW1_secA_1_20	ATTTGTAAGTTACGGACAACAAGATTCTTTTATTGAATATCAAAAAGAAGGACAAGTTTTATTCAATAACATGATTGCAAAAATTGCAAACGACATTACTGCTACTATTTTAAAGTTTTC		2261	2381	-	16SrI-TW1_secA	619943	26.67
619943_24243593_16SrI-TW1_secA_1_21	CTTTCGCAGATAGTTTTAAAACGCCTCCCAAACAAAAAGTTTTTTTAAACAATGATTCAAGCGATGATGAATCTTCTAAAAAAAGAAGAACTAGAAAAGTAAGAACTTCTAAAAAACCTT		2380	2500	-	16SrI-TW1_secA	619943	29.17
619943_24243594_16SrI-TW1_NusA_1_1	TTGATTAGTAAGAATTTTTTTAAACTTTTAGATAAAATCGCTCAAGAAAGAGATTTAGATAAAGACCAAGTTATTGATGCTTTTGCTAAAGGATTGATTTCTGGTTGCAAAAAAAATCAT		0	120	-	16SrI-TW1_NusA	619943	25.83
619943_24243594_16SrI-TW1_NusA_1_2	TAAAGTTAAAAGCTGTAAAATTGAGTTAAAAGAAGACAAAAGCGAAATTATTTTATATAAACAATTTTTGGTTGCCGACGAAGCTACTATGAGCACTATTAATTTAAAAGAGTCAACTCC		119	239	-	16SrI-TW1_NusA	619943	28.33
619943_24243594_16SrI-TW1_NusA_1_3	CCATTACTCTTGAAGAAGCCCAACAAATTAAGCCTCATGCCAAAATAGGTCAAGTAATTGATATTAAAGTTGATCCTAAAGATTTTAATCTATACGCTGTCAAAGAACTTAAAAATCAAT		238	358	-	16SrI-TW1_NusA	619943	30.83
619943_24243594_16SrI-TW1_NusA_1_4	TTCAACGAAGAGCTTACCAAAAAGAAAAGAGAAAGCATTTATAATTTTTTCAAACAACAAGAAGGCAAATTAATTAGCGCTAAAATTATTTCGGAAAACGATAAATTTTATAATTTGGAA		357	477	-	16SrI-TW1_NusA	619943	25.83
619943_24243594_16SrI-TW1_NusA_1_5	ATTAGAAAAAGAAATTACTACCTTGCTGCCTAAAAAAGAAATTGCTTCCAATAATGAAATGCAAGTAGGCGAAAGAATTCAAGTTTTTTTGTCAGAAGTAAGAAAAACTACTAAATGGCC		476	596	-	16SrI-TW1_NusA	619943	30.83
619943_24243594_16SrI-TW1_NusA_1_6	CTAAGATTTTTGTCAGTTGTAATCATGTGGGACTTGTAGTTAAAGTGTTAGAAGAAAATATTCCTGAAATCCAAGAAGGCATCGTTAAAATTGCAGGGGTTGCCCGCATTTCTGGCGAAC		595	715	-	16SrI-TW1_NusA	619943	39.17
619943_24243594_16SrI-TW1_NusA_1_7	CGTACCAAAATTGGTTTATTGTCCTGCGACGCTCAAGTAGATGCCATTGGCTCTTGTATTGGCGAAAGAAGTAACCGTATTAAAAATGTTATCAAAATCCTTAAAGACGAAAAAGTTGAT		714	834	-	16SrI-TW1_NusA	619943	36.67
619943_24243594_16SrI-TW1_NusA_1_8	TTTATTTGTTTGGAGCGACGATCCCCAAGAACTTATTGCAAATGCCCTCAAACCTGCTTCATGCCTTCAAGTTGTCATCAAAGACGACATTAACAAATACGCTCTTGCAATTGTTCCTGA		833	953	-	16SrI-TW1_NusA	619943	40.83
619943_24243594_16SrI-TW1_NusA_1_9	ACGACCAATTTTCTTTAGCGATTGGTAAATTAGGTAAAAATGTTAAATTAGCAGTGGAAGTAACTAAGTGGAATATTGATATCAAAACCTTAGATCAAGCCCAAACAGAAGGATTAATTT		952	1072	-	16SrI-TW1_NusA	619943	30.83
619943_24243595_16SrI-TW1_rp_1_1	TTTTCCCCTACACGTACTTACCGCGGACACAACAAAAAAGACAAAAAAATTCAAAAAAAATAAAATAATGGGAAGGAATAACTATGGAAACCAAAAACGCCAAAGCGATTGCTAGAAAAG		0	120	-	16SrI-TW1_rp	619943	34.17
619943_24243595_16SrI-TW1_rp_1_2	TGCTAGAAAAGTTTCAATCGCCCCTCGAAAAGCACGTTTAGTTGTTGATTTAATTCGAGGAAAAAATATTGCACAAGCTCAAGCCATTTTAACTTTTACCCCTAAAGTAGCTGCTCCCGT		109	229	-	16SrI-TW1_rp	619943	39.17
619943_24243595_16SrI-TW1_rp_1_3	GCTGCTCCCGTTATTTTAAAACTTTTAAACAGTGCTGTTTCCAATGCTGTTAATAATTTAAAATTAAACCGCGAACAACTTTATGTTAAAGAAGTTTTTGTCAACGAAGGTTTGCGTTTA		218	338	-	16SrI-TW1_rp	619943	31.67
619943_24243595_16SrI-TW1_rp_1_4	GTTTGCGTTTAAAACGTATGTTTCCAAGAGCTAAAGGTTCTGGTGATATGATTAAAAAAAGAACCAGCCACATTACTTTAGTAATAACTTCTAGCACAAACTTGCAAACATCAAAGGAGG		327	447	-	16SrI-TW1_rp	619943	35
619943_24243595_16SrI-TW1_rp_1_5	ATCAAAGGAGGAAGAACAAAGTGGGTCAAAAAACTAATCCTAACGGCTTAAGATTAGGCATTATTAGAACTTGGGAATCTCAATGGTGTGTTAATGATAAAGAAATTCCTAATTTAATTA		436	556	-	16SrI-TW1_rp	619943	31.67
619943_24243595_16SrI-TW1_rp_1_6	TAATTTAATTAAAGAAGATTTTTTAATTCGTAAACTAATCAATAATTTTACTAAAAAAAGTGCTATCAGTCAAATTGACATTGAACGCCTAAAAGAAAAAAATAAAAACCGTATCACTAT		545	665	-	16SrI-TW1_rp	619943	21.67
619943_24243595_16SrI-TW1_rp_1_7	CGTATCACTATTTCTGTCCACACCGCTAAACCAGGCGTTATTATTGGAAAAGATGGCGATACACGCAACAAATTAGTTGCCAAACTCAAAGAACTTACCCAAAAAGACGTTAATCTTAAC		654	774	-	16SrI-TW1_rp	619943	39.17
619943_24243595_16SrI-TW1_rp_1_8	TTAATCTTAACGTGTTAGAAGTTAAAAACTCTGATAAAATCGCTTTATTAATTGCTCAAAATATGGCTGAACAACTAGAAAATCGTATGTTTTTCCGCCGTGTTCAAAAAATGGCAATCC		763	883	-	16SrI-TW1_rp	619943	31.67
619943_24243595_16SrI-TW1_rp_1_9	AATGGCAATCCAAAAAGCCCTAAAAGCTGGTGCCAAAGGAGTAAAAACTTTAATTTCTGGTCGTTTGGGTGGTGCTGAAATAGCTCGTAGCGAAGGACATGCCGAAGGCAGAGTTCCTCT		872	992	-	16SrI-TW1_rp	619943	45.83
619943_24243595_16SrI-TW1_rp_1_10	AGAGTTCCTCTACACACTCTAAGAGCAGACATCGATTACGCTGCTGTTGAAGCTCACACTACTTATGGAGTTTTAGGAATTAAAGTATGGATTTTCCACGGTGAAGTTTTACCAGGACAA		981	1101	-	16SrI-TW1_rp	619943	40.83
619943_24243595_16SrI-TW1_rp_1_11	TACCAGGACAAACCATTCTAGACACTAGAAAACCGTTTGCTTCCCAATCTTCTAACACACCTAACAGACGCCCTCGCAATTTCAAAGGAGGCAACAATAATCATGTTAATGCCAAAAAGA		1090	1210	-	16SrI-TW1_rp	619943	40.83
619943_24243596_16SrIII-CX_16S-23S_1_1	AACGCTGGCGGCGTGCCTAATACATGCAAGTCGAACGGAAACCTTCGGGTTTTAGTGGCGAACGGGTGAGTAACACGTAAGCAACCTGCCCTTAAGACGAGGATAACAATTGGAAACAGT		0	120	-	16SrIII-CX_16S-23S	619943	50
619943_24243596_16SrIII-CX_16S-23S_1_2	GTTGCTAAGACTGGATAGGAAAAGTAAAGGCATCTTTACTTTTTTAAAAGATCTTCTTTGAAGGTATGCTTAAGGAGGGGCTTGCGACACATTAGTTAGTTGGTAGGGTAAAGGCCTACC		118	238	-	16SrIII-CX_16S-23S	619943	40
619943_24243596_16SrIII-CX_16S-23S_1_3	CCAAGACTATGATGTGTAGCTGGACTGAGAGGTTGAACAGCCACATTGGGACTGAGACACGGCCCAAACTCCTACGGGAGGCAGCAGTAGGGAATTTTCGGCAATGGAGGAAACTCTGAC		236	356	-	16SrIII-CX_16S-23S	619943	52.5
619943_24243596_16SrIII-CX_16S-23S_1_4	ACCGAGCAACGCCGCGTGAACGATGAAGTACCTCGGTATGTAAAGTTCTTTTATTAAGGAAGAAAAAAGAGTGGAAAAACTCCCTTGACGGTACTTAATGAATAAGCCCCGGCTAATTAT		354	474	-	16SrIII-CX_16S-23S	619943	41.67
619943_24243596_16SrIII-CX_16S-23S_1_5	ATGTGCCAGCAGCCGCGGTAATACATAAGGGGCGAGCGTTATCCGGAATTATTGGGCGTAAAGGGTGCGTAGGCGGTTTAATAAGTCTATAGTTTAATTTCAGTGCTTAACGCTGTTGTG		472	592	-	16SrIII-CX_16S-23S	619943	46.67
619943_24243596_16SrIII-CX_16S-23S_1_6	TGCTATAGAAACTGTTTTACTAGAGTGAGATAGAGGCAAGCGGAATTCCATGTGTAGCGGTAAAATGCGTAAATATATGGAGGAACACCAGAGGCGTAGGCGGCTTGCTGGGTCTTTACT		590	710	-	16SrIII-CX_16S-23S	619943	45
619943_24243596_16SrIII-CX_16S-23S_1_7	CTGACGCTGAGGCACGAAAGCGTGGGGAGCAAACAGGATTAGATACCCTGGTAGTCCACGCCGTAAACGATGAGTACTAAGTGTCGGGTAAAACTGGTACTGAAGTTAACACATTAAGTA		708	828	-	16SrIII-CX_16S-23S	619943	47.5
619943_24243596_16SrIII-CX_16S-23S_1_8	TACTCCGCCTGAGTAGTACGTACGCAAGTATGAAACTTAAAGGAATTGACGGGACTCCGCACAAGCGGTGGATCATGTTGTTTAATTCGAAGATACGCGAAAAACCTTACCAGGTCTTGA		826	946	-	16SrIII-CX_16S-23S	619943	45
619943_24243596_16SrIII-CX_16S-23S_1_9	GACATTTTCTTGCGAAGTTATAGAAATATAATGGAGGTCATCAGGAAAACAGGTGGTGCATGGTTGTCGTCAGCTCGTGTCGTGAGATGTTAGGTTAAGTCCTAAAACGAGCGCAACCCT		944	1064	-	16SrIII-CX_16S-23S	619943	44.17
619943_24243596_16SrIII-CX_16S-23S_1_10	CTTGTCGTTAGTTGCCAGCATGTAATGATGGGGACTTTAACGAGACTGCCAATGAAAAATTGGAGGAAGGTGGGGATTACGTCAAATCATCATGCCCCTTATGATCTGGGCTACAAACGT		1062	1182	-	16SrIII-CX_16S-23S	619943	45
619943_24243596_16SrIII-CX_16S-23S_1_11	GTGATACAATGGTTGATACAAAGAGTAGCTGAAACGCGAGTTCTTAGCCAATCTCAAAAAATCAATCTCAGTTCGGATTGAAGTCTGCAACTCGACTTCATGAAGTTGGAATCGCTAGTA		1180	1300	-	16SrIII-CX_16S-23S	619943	40
619943_24243596_16SrIII-CX_16S-23S_1_12	TAATCGCGAATCAGCATGTCGCGGTGAATACGTTCTCGGGGTTTGTACACACCGCCCGTCAAACCACGAAAGTTGGCAATACCCCAAAGCGGTCACCTAACTTCGCAAGAAGAAGGATCC		1298	1418	-	16SrIII-CX_16S-23S	619943	51.67
619943_24243596_16SrIII-CX_16S-23S_1_13	CCGTCTAAGGTAGGGTCGATAATTGGGGTTAAGTCGTAACAAGGTATCCCTACCGGAAGGTGGGGATGGATCACCTCCTTTCTAAGGAAAAAATAAAATTATCATCTTCAGTTTTGAAAG		1416	1536	-	16SrIII-CX_16S-23S	619943	41.67
619943_24243596_16SrIII-CX_16S-23S_1_14	AGACTTAGAAAATTCATAAGTTTTTCTTTTTTTAAGGCATTAAGGGCCTATAGCTCAGCTGGTTAGAGCACACGCCTGATAAGCGTGAGGTCGGTGGTTCAAGTCCATTTAGGCCCACCA		1534	1654	-	16SrIII-CX_16S-23S	619943	43.33
619943_24243596_16SrIII-CX_16S-23S_1_15	CAGTTTATTTTAAAAGTTATAAGCACTGTCTTAAAAAAAAGTTCTTTGAAAAGTAGATAAACATAGTAAAATCAAAAAAATTGAAGGAATTAAGAGCGCACAGTGGATGCCTTGGCACC		1652	1771	-	16SrIII-CX_16S-23S	619943	30.25
619943_24243597_16SrIII-CX_tuf_1_1	ATGGCTACTAAAAATTTTAACAGAAATAAACCACACGTTAACGTAGGAACTATTGGTCACGTTGATCATGGTAAAACTACTTTAACAGCTGCAATTACTTCTTATTTATCTACAAAAGGA		0	120	-	16SrIII-CX_tuf	619943	31.67
619943_24243597_16SrIII-CX_tuf_1_2	GATTAGCAGATAAACAAAGTTACGATCAAATCGATAAAGCACCTGAAGAAAAAGAACGTGGTATCACTATTAGTACTTCTCACGTAGAATACGAAACAGAAAAAAGACACTATGCTCACG		118	238	-	16SrIII-CX_tuf	619943	35.83
619943_24243597_16SrIII-CX_tuf_1_3	CGTAGATTGTCCTGGGCACGCCGATTACATTAAAAATATGATTACTGGTGCTGCTCAAATGGATGCTGGTATTTTAGTAATTTCTGCTGTTGACGGAATCATGCCCCAAACAGAAGAACA		236	356	-	16SrIII-CX_tuf	619943	41.67
619943_24243597_16SrIII-CX_tuf_1_4	CATATCTTATTAGCTAAACAAGTAGGTGTTCCTAAATTATTAGTTTTCATCAACAAATGTGATGTTGCTGCTGATGAAGAACTTTTAGAATTAGTAGAAATCGAAATTAGAGACTTATTA		354	474	-	16SrIII-CX_tuf	619943	28.33
619943_24243597_16SrIII-CX_tuf_1_5	TAAACAAACATGATTTTTTAGGCAACGAAGTTCCTATCGTTAGAGGATCTGCTTTAAAAGCGGTTGAAGGAGACCCTAAATATTTAGAAAAAATCCAAGAATTACTTGACTTATTAGACA		472	592	-	16SrIII-CX_tuf	619943	32.5
619943_24243597_16SrIII-CX_tuf_1_6	CACTTACGTGGAAGACCCAGTTCGTGAAATGAACAAACCTTTTTTAATGCCAATAGAAGATGTTTTCACTATCACGGGTAGAGGAACTGTTACTACTGGACGTGTTGAAAGAGGAATGGT		590	710	-	16SrIII-CX_tuf	619943	40.83
619943_24243597_16SrIII-CX_tuf_1_7	GTTAAAGTTGGTGAAGAAGTAGAAATAGTTGGAATTAGAGAAACTAAAAAAGCTGTTGTTACAGGTTTAGAAATGTTTAGAAAATCTTTAGAAACAGCGCAAGCTGGTGACAACGTAGGG		708	828	-	16SrIII-CX_tuf	619943	35
619943_24243597_16SrIII-CX_tuf_1_8	GGGTTTTATTGCGTGGTGTTTCTCGTGAAGACGTAGAACGTGGACAAGTTTTAGTTAAGCCTGGCAGCGTTCAACCACATTCTAAATTCTTAGCGCAAATTTATGTTCTTACAGCTGAAG		826	946	-	16SrIII-CX_tuf	619943	41.67
619943_24243597_16SrIII-CX_tuf_1_9	AGAAAACGGAAGAACTACTCCTTTCGGTAATAATTATCGTCCTCAATTCTATTTAAGAACTACTGACGTGACTGGTGTTATCAAATTGCAAGATGGTGTTGAAATCGTAATGCCTGGTGA		944	1064	-	16SrIII-CX_tuf	619943	37.5
619943_24243597_16SrIII-CX_tuf_1_10	GATTTAGTGGAAGTTACAGTTACTTTAATTAGTTCAATCGCTATGGAAGAAGGAACTAAATTTTCTGTTCGTGAAGGTGGACGCACTGTTGGAGCAGGTTCAGTAATTAAAATTCTTGAA		1062	1182	-	16SrIII-CX_tuf	619943	35.83
619943_24243598_16SrIII-CX_secY_1_1	ATGGTAATAGATTTTCTTCGTGATAAAAGTAAAATAATTAAAAAAATTTTATTTACTTTAGTTATTTTATTTATCTTTGTTATCGGTAATAAATTAGTTATTCCTTCTGTGACGGTTCAA		0	120	-	16SrIII-CX_secY	619943	20.83
619943_24243598_16SrIII-CX_secY_1_2	GTTCAAGAAAAATTTCTTTTTGACATTAAACAATATTTTTCTAAGTCTAGTTTATTTGAAGCTAATGGTTCTATATATTTTTTATCTTTAGGGGTTTATCCCTATATCACTGCCTCTATT		114	234	-	16SrIII-CX_secY	619943	25.83
619943_24243598_16SrIII-CX_secY_1_3	TCTATTATTGTCCAGTTTTCGCAAAAATTATTTTCTTTTATGAAAGAATGGCAAGAACAAGGTGAAAGAGGAAAATATAAAACGAATTTAGTTGCTCGTTCTTTGACTTTACTATTTGCG		228	348	-	16SrIII-CX_secY	619943	30
619943_24243598_16SrIII-CX_secY_1_4	TTTGCGGTAGGATTGGCTTTATCTTCTATTCAACGCGATGGAATCTCCTCGCTCGCTAACAATAAGGCACACGTTTTAACAATAGTGTTTTTTTTAGTGGTCGGAGCCTTCATTAGCATT		342	462	-	16SrIII-CX_secY	619943	40.83
619943_24243598_16SrIII-CX_secY_1_5	AGCATTTGGTTAGCTGATTTAATCACTTCTAAAGGGGTAGGAAACGGTATTTCTATTTTCGTAGCAATTAGTGTAAGTAAAAATTTATATGATACGCTGAAGTTTTTAACTAACGTCAAC		456	576	-	16SrIII-CX_secY	619943	31.67
619943_24243598_16SrIII-CX_secY_1_6	GTCAACAATCCAGACTTTGTAGCTAAAAGAATATTCACTTTAGTAGTTCTGTTAATCTTGTTAATTTTAACAGTGATTTTATCAGCTGCTTATTTAAAAGTGCCAATCACTTACGCTACT		570	690	-	16SrIII-CX_secY	619943	30.83
619943_24243598_16SrIII-CX_secY_1_7	GCTACTAAACAAAATAATGATAAAATAAAAAATCATATCCCTTTAAAACTTAATACTTCAGGAATTTTGCCAGTTATTTTAGCCAATAGTTTATTGCAAGTTTTTGGAACTATTTCTCTT		684	804	-	16SrIII-CX_secY	619943	25
619943_24243598_16SrIII-CX_secY_1_8	TCTCTTTTGTTGGGGCCAGAAAATGGTTTTTCCCAATGGGTAAATCGATTTCAAGATTCTCAAAGTAATTATTTAGGTTTAGGTTTTTTCGTTTACTTATTATTAATTTTGTTATTTTCA		798	918	-	16SrIII-CX_secY	619943	28.33
619943_24243598_16SrIII-CX_secY_1_9	TTTTCAGTTTTTTCTACTTTTATAACTATCAATCCGACAGACATTGCTGAACATTTATCAAAACAAGATGCTTACTTAGAAGGGGTAAAACCTGGAGACGAAACGGTTTATAAAATTACT		912	1032	-	16SrIII-CX_secY	619943	31.67
619943_24243598_16SrIII-CX_secY_1_10	ATTACTCAAAAATTATTTAAAGTAACAGTCATCGGCGCTTTTGCTTTAACTGTCTTAGCTGCTTTACCCGAATTTATTAAATTTTTTGTTTGGACTAATGATTCTGACAAAACATTCAAA		1026	1146	-	16SrIII-CX_secY	619943	29.17
619943_24243598_16SrIII-CX_secY_1_11	TTCAAAGTTCAATTAGGCGGCACTAGTCTTTTAATTGTTGTAGGTGTGGCTGTTGAAGTAATGCAACGTATAACGACTCAAACTAATGTTAAGAAATTATACAAAAAATTATTTTAA		1140	1257	-	16SrIII-CX_secY	619943	29.91
619943_24243599_16SrIII-CX_secA_1_1	ATGTTAAGTTTTATTAAAAAATTATTTGATTCTTCCAATAAATATTTAAAAAAAGCGAAAGTAACAAGTACTAAAATTGAAAAATTAGAAGAAGAGATGCAACGACTAAAAGATGAAGAT		0	120	-	16SrIII-CX_secA	619943	21.67
619943_24243599_16SrIII-CX_secA_1_2	TTTTCCTAAAGAAACCGAAAAATTAAAACAACGTTTTCAAGAAGGTGCTTCTTTAGATAGTTTATTAGTGGAAGCTTACGCTTTAGCGAGAGAAGCTTCCAGAAGAGTAACTGGTTTAAC		119	239	-	16SrIII-CX_secA	619943	35
619943_24243599_16SrIII-CX_secA_1_3	CACCTTATTACGTACAACTTTTAGGTTCTATCGTTTTACATCAAGGACAAATAGCCGAAATGAAAACAGGAGAAGGTAAAACTTTAACTTCTGTTTTACCAGCTTATTTAAACGCTTTAA		238	358	-	16SrIII-CX_secA	619943	32.5
619943_24243599_16SrIII-CX_secA_1_4	AGTGGCAATTCAGTTCATATCGTGACAGTTAATGAATATTTAGCTAGTCGTGAAGCCGAAGGGAAAATAGGCGATATTTTCCGTTTTTTAGGCATGACTGTAGGTTTAAATACTAAAGAT		357	477	-	16SrIII-CX_secA	619943	35.83
619943_24243599_16SrIII-CX_secA_1_5	TAAAACCATTCCCGAAAAACAATTAGCTTATCAAGCCGATATTCTTTATTCTACTAATAGTGAATTAGGTTTCGATTATTTAAGAGATAATATGGAAACTGATATTAATAATTTAATGAT		476	596	-	16SrIII-CX_secA	619943	25
619943_24243599_16SrIII-CX_secA_1_6	TGCATCGTGATTATAACTACGTTATTATTGATGAAATAGACTCTATTTTAATTGATGAAGCCAGAACTCCTTTAATTATTTCGAGCAACACTCAACAAGGTAAAAAGTTTTACCGTGATG		595	715	-	16SrIII-CX_secA	619943	31.67
619943_24243599_16SrIII-CX_secA_1_7	GCTGATCGTTTCGTAAAAAGCTTAAAACCAGAACATTATATGATCGATTTAGAATCTAAAACTATCGAATTAACTGAAGAAGGCGTACGAAAAGCTGAAGCTTTTTTCCAATTAACTAAT		714	834	-	16SrIII-CX_secA	619943	31.67
619943_24243599_16SrIII-CX_secA_1_8	TTTATACAATAATTCTCACTCTTTGTTATTACACCACATTAAAAATAGTTTAAAAGCCGGTTTTATTATGGAAAAAAATAAAGATTATTTAGTGGATAAAGGACAAGTCTTAATTATTGA		833	953	-	16SrIII-CX_secA	619943	23.33
619943_24243599_16SrIII-CX_secA_1_9	ACCAATTCACTGGTAGGATTTTAAATGGTCGTCAATTCAGCGATGGTTTACATCAAGCGATCGAAGCTAAAGAAGGATGTGTTATTAAAGAAGAAACAGAAGTTTCCGCTACTATTACTT		952	1072	-	16SrIII-CX_secA	619943	36.67
619943_24243599_16SrIII-CX_secA_1_10	TACCAAAATTTCTTTAGAATTTACCGTAAAATGTCAGGTATGACAGGAACAGCTAAAACAGAAGAAAAAGAATTTGTTAATATTTATAAAATGAAAGTAGTGGAAATTCCTACTAATAAA		1071	1191	-	16SrIII-CX_secA	619943	25.83
619943_24243599_16SrIII-CX_secA_1_11	ACCAATGATTAGAGAAGACGCTCCTGATTATGTTTTCGCTTCTGCTGAAAAAAAATGGCAAGCTTTATTAGGCGAAATTGAAAAAAGGCATGCTAGACAACAACCTATTTTAATAATCGG		1190	1310	-	16SrIII-CX_secA	619943	35.83
619943_24243599_16SrIII-CX_secA_1_12	GAACATCAACAGTGGAAGTTTCTGAAGAAATATCTAAATATTTGAAAAAAAGAAAAATTAAACATGAAGTTCTTAACGCTAAAAACCACTCTAAAGAGGCAGAAATTATCGCTAAAGCCG		1309	1429	-	16SrIII-CX_secA	619943	30.83
619943_24243599_16SrIII-CX_secA_1_13	GGACATAAAGGTTCTATCACTATCGCTACTAATATGGCTGGTCGTGGGACTGATATCCGTTTAGGCGAAGGAGTAGTTGAATTAGGTGGATTAGCTGTTTTGGGGACCGAAAGGAACGAG		1428	1548	-	16SrIII-CX_secA	619943	45.83
619943_24243599_16SrIII-CX_secA_1_14	GGCACGTAGAATCGATAACCAATTAAGAGGACGTGCCGGACGTCAAGGAGACCCGGGTTTTTCCCGTTTTTTCGTTTCCGCTGATGATGATTTAGTGAAACGTTTTGGCAGTAACAGAAT		1547	1667	-	16SrIII-CX_secA	619943	45.83
619943_24243599_16SrIII-CX_secA_1_15	TGCAAAGAATTATCGCTATGTTACAAAACAACAGCGATTCTGATGAACCTATCACTTTAAAAATGTTTAGTAATTTTGTGACTAATATTCAGAAAAAAATCGAATCTTCTAATTATGATT		1666	1786	-	16SrIII-CX_secA	619943	26.67
619943_24243599_16SrIII-CX_secA_1_16	TACCGTAAATTTGTTTTACAATTTGATTCTGTTTTAAGATTACAAAGAGAAATCATTTACCAACAAAGAAAAGAAATTTTAAAATCTGAAGAAGTAGATGTTTTAGCTGTAAACCTAATG		1785	1905	-	16SrIII-CX_secA	619943	25
619943_24243599_16SrIII-CX_secA_1_17	GAATAAAACTTTAAACAGTAATATTGATTACTTTTTAAAAAATAAAATGACCAATAAAGATGATGAAGGTATTAAAGAATTTATAACTTATTTAGAAACTTTATTTTTCCTTCCCAATAC		1904	2024	-	16SrIII-CX_secA	619943	20
619943_24243599_16SrIII-CX_secA_1_18	CTTTTACGGTCCAAGATTTCCAAACTCAAGAAGAACCACGTTCTCTTTTGACTTCTAAAGAAATAGAAGAAGTAGTGCAAAAAAAAGTAACGACTTTCTTGGAAGAGCAAAAAGCTAAAT		2023	2143	-	16SrIII-CX_secA	619943	34.17
619943_24243599_16SrIII-CX_secA_1_19	TTACAAGTTATTGATGATAAGCAGTATTTTTATGTTTTAAGATACATTATGCTACAAAAAATAGATTCTTATTTCAAACGTCATATTAATGATATGAATATTTTGAGAAGAGGAATTAAT		2142	2262	-	16SrIII-CX_secA	619943	21.67
619943_24243599_16SrIII-CX_secA_1_20	TTTTTTAAGTTACGGTCAACAAAACTCCTTAGTAGTTTACCAAGAAGAAGGGCAAAAGTTTTTCAACCAAATGATCGAAAATATCGCTCTTGATGTAACAAAAACTATTTTAAAAAGTTC		2261	2381	-	16SrIII-CX_secA	619943	30
619943_24243599_16SrIII-CX_secA_1_21	CCACTTTAACCGACCAATTAGTGGAATCATTTCAAGAAAAATTAATTTTCAACCGTCCTGTTTCTAAAAACAATACTGCGAAAAGGAAAAATAGAAAAGTTAGAGGTTCTAGAAAACCTT		2380	2500	-	16SrIII-CX_secA	619943	31.67
619943_24243600_16SrIII-CX_NusA_1_1	TTGAAAAATAAAGAATTTTTAAATAATATAGATCAATTATCGCAAGAATACGAAATAACTCGTGAACAGACTATTCAATCTTTTGAAAAGAGTTTAGTTTCTGGTTGTAAAAAAAATTAC		0	120	-	16SrIII-CX_NusA	619943	23.33
619943_24243600_16SrIII-CX_NusA_1_2	ACCAAGTTAAAAGTTGTCGTACAGAAATTACTCCAGAATATGATGAAATTTTTTTATATAAACAATATTTAGTAATTGATCCTAACGACGAAGAAACGCTAAACGCTAACGAATATAGTT		118	238	-	16SrIII-CX_NusA	619943	28.33
619943_24243600_16SrIII-CX_NusA_1_3	TTGCCTTGATTTAGAGGAGGCGCAAAAATTAAAAGAAGACGCACAAGTAGGAGATATTATCGAAATTGAAGTTGATCCGAAAGATTTTAATTTTTATGCTAGCAAAGATTTTAAAAATAA		236	356	-	16SrIII-CX_NusA	619943	30
619943_24243600_16SrIII-CX_NusA_1_4	AAATTTAACGAAGAATTGATCAAACAAAAAAGAGAAACCATTTATAATTTTTTTAAAAATTATGAAAACAAATTAATCAGCGGTAAAGTAATAGCGGAAAGCGATCATTTCTACACTTTA		354	474	-	16SrIII-CX_NusA	619943	24.17
619943_24243600_16SrIII-CX_NusA_1_5	TAGAATTAGAAAAAGAAATAAATACTTTATTATCTAAAAAAGAAACCCTTCTTAATGATAATTTTCATATTGGCGAAAGAATTTTAGTTTTTGTCGCAGAAGTTCAAAATACTACTAAAA		472	592	-	16SrIII-CX_NusA	619943	22.5
619943_24243600_16SrIII-CX_NusA_1_6	AATGCCTAAAGTTTTTGTTAGTAGAGTCCATGTTAATTTTGTTGTTGAATTATTAAAAGAATTTGTTCCAGAAGTGCAAGAGGACATCATTAAAATTATGGGAATAGCGCGTATACCATC		590	710	-	16SrIII-CX_NusA	619943	31.67
619943_24243600_16SrIII-CX_NusA_1_7	TCAGACAGAATTAAAATAGGCTTAATTTCTACTGATCCTAAAGTAGACCCTATTGGTTCTTGCATCGGCGAAGGCGGAAGTAGAATAAAAAGTGTGGTTAACATTTTAAAGGGCGAAAAG		708	828	-	16SrIII-CX_NusA	619943	37.5
619943_24243600_16SrIII-CX_NusA_1_8	AGATTGATTTATTTCAATGGAGTTCTGATCCGATAGAATTGATAACTAACTCTCTTCAACCGGCTCAAATTCTTAAAATCACCGCTATTAACGAAAAAAATAAAACAGCGTCTGTTGTGG		826	946	-	16SrIII-CX_NusA	619943	34.17
619943_24243600_16SrIII-CX_NusA_1_9	GGTTGCTGACGATCAAATCTCTTTAGTAATTGGTAAATTAGGCAAAAACGTTAAATTAGCCGCTCAGGTGACTAAATGGAATATTAACATTCAAACCTTATCCCAACAAGAAAAAGTAGA		944	1064	-	16SrIII-CX_NusA	619943	34.17
619943_24243601_16SrIII-CX95_JQ360955_rp_1_1	GGGCACAAATTAGGTGAATTTTCTCCAACTCGTACTTTTCGTGGACATGCTAAAAAAGATAAAAAAATTCAAAAAAAATAATTTAGAAAGGCATTAAACATATGAATGTAAAATCTATTG		0	120	-	16SrIII-CX95_JQ360955_rp	619943	27.5
619943_24243601_16SrIII-CX95_JQ360955_rp_1_2	AAATCTATTGCAAATCAGATGTCTGTTGCTCCTAGAAAAACACGTTTAGTAGCGGATTTAATCCGTGGCAAACATGTCAGAGAAGCACAAGCAATTTTGATGTTTACTCCAAAAGCAGCA		110	230	-	16SrIII-CX95_JQ360955_rp	619943	38.33
619943_24243601_16SrIII-CX95_JQ360955_rp_1_3	AAAAGCAGCATCTCCAATCGTTTCAAAGCTTTTAAAAAGTGCTGTTGCCAACGCTGTTCATAATTTTAGCCTTAAAGAAGAAGAATTATACGTGAAAGAAATTTTTGTTAATGAAGGTCT		220	340	-	16SrIII-CX95_JQ360955_rp	619943	32.5
619943_24243601_16SrIII-CX95_JQ360955_rp_1_4	ATGAAGGTCTTCGTTTAACTCGTTTATTACCAAGAGCTAAAGGGAAAACTGATAAAATTAAGAAAAGAACTTCTCATATTACAATAGTTGTTTCTTCCAAAACGGTAGAAGAAAAGAAAA		330	450	-	16SrIII-CX95_JQ360955_rp	619943	30
619943_24243601_16SrIII-CX95_JQ360955_rp_1_5	GAAAAGAAAATAGTTAAAAAGCAATCAGCCATCCAACAAATAGAAGGAAAGGAGATAGTTGAAAATGGGTCAAAAGAGTAGTCCAACCGGTTTAAGATTAGGAATAATTAGAAATTGGG		440	559	-	16SrIII-CX95_JQ360955_rp	619943	33.61
619943_24243602_16SrIII-CX95_JQ360955_rp_2_1	ATTCCAAATGGCACGCCGAAGACAAACAAGTTCCTAATTTAATTCTTGAAGATTATCAAATCAGAAATTTAATTAATAACCATTATCCTAAAGCAACTATTTCCCGTATTGAAATTCAAC		560	680	-	16SrIII-CX95_JQ360955_rp	619943	30
619943_24243602_16SrIII-CX95_JQ360955_rp_2_2	CAACGTTTTAAAAAATCCAACAAAGAACAAATCCAAATTTTTTTATACACTTCAAAATCAGGCATAGTTGTTGGACATGAAAACAAAGAAAAAAATAAATTAGTTGAAAAAATCACAAAA		676	796	-	16SrIII-CX95_JQ360955_rp	619943	24.17
619943_24243602_16SrIII-CX95_JQ360955_rp_2_3	AAAATTGATTAAAAAAGATATTATTTTAAACGTCTTAGAAATTAAAAACCCTGATAAAGTGGCTATATTGGTAGCACAAAATTTAGCTATCCAATTAGAACAAAGAGCTTTTTTCCGAGC		792	912	-	16SrIII-CX95_JQ360955_rp	619943	27.5
619943_24243602_16SrIII-CX95_JQ360955_rp_2_4	GAGCTGCTCAAAAAATGACAGTGCAAAAGGTTTTAAAAACAGGCGTTAAAGGTGTTAAAATTATTATTTCTGGTCGTTTAGGAGGTGCTGAAATAGCTAGACAAGAAACCCTTTCTAAAG		908	1028	-	16SrIII-CX95_JQ360955_rp	619943	35.83
619943_24243602_16SrIII-CX95_JQ360955_rp_2_5	AAAGGACTTGTTCCTCTTCATACTCTAAGAGCGGATATCGATTATGCTTTTGAAGAAGCTCACACTACTTATGGCGTTTTAGGCGTTAAAGTATGGATTTATCATGGCGAAGTTTTACCT		1024	1144	-	16SrIII-CX95_JQ360955_rp	619943	38.33
619943_24243602_16SrIII-CX95_JQ360955_rp_2_6	ACCTAAACAAACTATCGAAGATACTAGAAAATTATTAGTTTCTCAACATGATGAAAAAAGAGTTAATCCTCAAGATAGAAAACCAAAATTTGACGACAGAAGATATAAATTTTCTGATAG		1140	1260	-	16SrIII-CX95_JQ360955_rp	619943	27.5
619943_24243602_16SrIII-CX95_JQ360955_rp_2_7	ATAGAAAACCAAAATTTGAAAATAAAAAACCATTTTTAAAAAAAGTTAACAATACTAAAAATGTTAAAACAAAAATAACGTCCTAGATGGGGAAAGAAGTAAATAATTATGTTAATGC		1256	1374	-	16SrIII-CX95_JQ360955_rp	619943	21.19
619943_24243603_16SrX-AT_16S-23S_1_1	AGAGTTTGATCCTGGCTCAGGATGAACGCTGGCGGCGTGCCTAATACATGCAAGTCGAACGGAAACTTTTAGTTTCAGTGGCGAACGGGTGAGTAACACGTAAGTAACCTGCCTCTTAGA		0	120	-	16SrX-AT_16S-23S	619943	49.17
619943_24243603_16SrX-AT_16S-23S_1_2	ACGAGGATAACAGTTGGAAACGACTGCTAAGACTGGATAGGAAGTTTTAAGGCATCTTGAAACTTTTAAAAGACCCGCAAGGGTATGCTAAGAGATGGGCTTGCGGCACATTAGTTAGTT		119	239	-	16SrX-AT_16S-23S	619943	42.5
619943_24243603_16SrX-AT_16S-23S_1_3	TGGTAAGGTAACGGCTTACCAAGACTATGATGTGTAGCTGGACTGAGAGGTTGAACGGCCACATTGGGATTGAGATACGGCCCAAACTCCTACGGGAGGCAGCAGTAAGGAATTTTCGGC		238	358	-	16SrX-AT_16S-23S	619943	50.83
619943_24243603_16SrX-AT_16S-23S_1_4	CAATGGAGGAAACTCTGACCGAGCAACGCCGCGTGAACGATGAAATATTTAGGTATGTAAAGTTCTTTTATTAAAGAAGAAAAAATGATGGAAAAATCATTCTGACGGTATTTAATGAAT		357	477	-	16SrX-AT_16S-23S	619943	34.17
619943_24243603_16SrX-AT_16S-23S_1_5	TAAGCCCCGGCTAACTATGTGCCAGCAGCTGCGGTAATACATGGGGGGCAAGCGTTATCCGGATTTATTGGGCGTAAAGGGTGTGTAGGCGGTTTAATAAGTCTATGGTATAAGTTCAAC		476	596	-	16SrX-AT_16S-23S	619943	48.33
619943_24243603_16SrX-AT_16S-23S_1_6	CGCTTAACGTTGTGATGCTATGGAAACTGTTTGACTAGAGTTGGATAGAGGCAAGTGGAATTCCATGTGTAGCGGTAAAATGCGTAAATATATGGAGGAACACCAGTAGCGAAGGCGGCT		595	715	-	16SrX-AT_16S-23S	619943	45
619943_24243603_16SrX-AT_16S-23S_1_7	TTGCTGGGTCTTAACTGACGCTGAGGCACGAAAGCGTGGGGAGCAAACAGGATTAGATACCCTGGTAGTCCACGCCGTAAACGATGAGTACTAAGTGTTGGGTTAAACCAGTGCTGAAGT		714	834	-	16SrX-AT_16S-23S	619943	50
619943_24243603_16SrX-AT_16S-23S_1_8	TTAACACATTAAGTACTCCGCCTGAGTAGTACGTACGCAAGTATGAAACTTAAAGGAATTGACGGGACTCCGCACAAGCGGTGGATCATGTTGTTTAATTCGAAGATACACGAAAAACCT		833	953	-	16SrX-AT_16S-23S	619943	41.67
619943_24243603_16SrX-AT_16S-23S_1_9	TTACCAGGTCTTGACATACTCTGCAAAGCTATAGAAATATAGTGGAGGTTATCAGGGATACAGGTGGTGCATGGTTGTCGTCAGCTCGTGTCGTGAGATGTTGGGTTAAGTCCCGCAACG		952	1072	-	16SrX-AT_16S-23S	619943	47.5
619943_24243603_16SrX-AT_16S-23S_1_10	GAGCGCAACCCTTATCGCTAGTTACCATCATTTAGTTGGGCACTTTAGTGAGACTGCCAATGATAAATTGGAGGAAGGTGGGGATTACGTCAAATCATCATGCCCCTTATGACCTGGGCT		1071	1191	-	16SrX-AT_16S-23S	619943	46.67
619943_24243603_16SrX-AT_16S-23S_1_11	TACAAACGTGATACAATGGCTGTTACAAAGAGTAGCTGAAGCGTGAGTTTTTAGCAAATCTCAAAAAAACAGTCTCAGTTCGGATTGAAGTCTGCAACTCGACTTCATGAAGTCGGAATC		1190	1310	-	16SrX-AT_16S-23S	619943	40
619943_24243603_16SrX-AT_16S-23S_1_12	CGCTAGTAATCGCGAATCAGCATGTCGTGGTGAATACGTTCTCGGGGTTTGTACACACCGCCCGTCAAACCATGAAAGTTGACAATACTCGAAACCAGTAGCCTAACTTGCAAAAGAGGG		1309	1429	-	16SrX-AT_16S-23S	619943	48.33
619943_24243603_16SrX-AT_16S-23S_1_13	GAACTGTCTAAGGTAGGGTCGATGATTGGGGTTAAGTCGTAACAAGGTATCCCTACCGGAAGGTGGGGATGGATCACCTCCTTTCTAAGGAAAATATCATCTTCAGTTGTGAAAGACTTA		1428	1548	-	16SrX-AT_16S-23S	619943	44.17
619943_24243603_16SrX-AT_16S-23S_1_14	AAAAAAGTTTTTTATTTTTTAAGATAAAAATAAATAATGGTCCGGGGCCTATAGCTCAGTTGGTTAGAGCACACGCCTGATAAGCGTGAGGTCGATGGTTCGAGTCCATTTAGGCCCACC		1547	1667	-	16SrX-AT_16S-23S	619943	40.83
619943_24243603_16SrX-AT_16S-23S_1_15	CAAAGTATTTATCTTAAGAAAACAAGCTCTTTGAAAAGTAGATAAATTAAGGTTAAAAGAATTGAAGAAATTAAGGGCGCACAGTGGATGCCTTGGCACTAAGAGCCGATGAAGGACG		1666	1784	-	16SrX-AT_16S-23S	619943	36.44
619943_24243604_16SrX-AT_cpn60_1_1	ATGGCAAAAGAAATTATTTACAATAAAGAAGCAAGAAAAGAACTTCTTAAAGGAGTAGATATTTTATCAAATACTGTTAAAGTTACCTTAGGTCCTAAAGGACGTAATGTTATTTTAGAA		0	120	-	16SrX-AT_cpn60	619943	26.67
619943_24243604_16SrX-AT_cpn60_1_2	TAGAAAAAAATTACGAATCTCCTTTAATCGTTAATGATGGAGTTTCTATTGCTAAAGAAATAGAATTAAAAGATCCTTTTCAAAATATGGGAGCTAAATTATTATATGAAGTTGCTTCTA		115	235	-	16SrX-AT_cpn60	619943	25.83
619943_24243604_16SrX-AT_cpn60_1_3	TTCTAAAACAAATGATAATGCAGGAGATGGAACCACAACTGCTACTATTTTAGCTCAAAAAATGATTCATAGAGGTTTTAAAGCAATAGATTTAGGGGCTAATCCTGTTTTAGTAAAAGA		230	350	-	16SrX-AT_cpn60	619943	31.67
619943_24243604_16SrX-AT_cpn60_1_4	AAAGAAGGAATAGAAAAAGCAACAAAAAAAGTTATATCAAAACTTTTAGAAAAATCAAAACCAGTAATAACACAAGAAGATATAGAAAATGTAGCTTCTATTTCATCTGGAAGTAAAGAA		345	465	-	16SrX-AT_cpn60	619943	25
619943_24243604_16SrX-AT_cpn60_1_5	AAGAAATTGGAAAAATAATTGCTTTAGCAATGCAAAAAGTAACAAAAAATGGTGTTATTAACGTTGATGAATCTAAAGGATTTGAAACCAAATTAGAAGTAGTTGAAGGTATGCAATATG		460	580	-	16SrX-AT_cpn60	619943	27.5
619943_24243604_16SrX-AT_cpn60_1_6	ATATGATAAAGGTTACGCTTCACCTTATTTTGTTAACAATAGGGAAACTATGTCAGTCGATTTAGAACAACCTTTAGTTTTAGTAACAGACCATAAAATAAACAATATTCAAGAAATTTT		575	695	-	16SrX-AT_cpn60	619943	27.5
619943_24243604_16SrX-AT_cpn60_1_7	ATTTTACATTTATTAGAAGAAGTAGTAAAACAAGGTAAGTCATTATTAATAATTGCTGATTCTGTTGAAAATGAAGTTACCAGTATTTTAGTTATCAACAAAATGAAAGGAACATTTAAT		690	810	-	16SrX-AT_cpn60	619943	23.33
619943_24243604_16SrX-AT_cpn60_1_8	TTAATATAGTTGTTACTAATGCGCCTGGTTTTGGTGATAATCAAAAAGAAAATTTACAAGATATTGCTATTTTAACTCAAGCTAAATTTATTTCTAAAGATTTAAATATGAATCTAAAAG		805	925	-	16SrX-AT_cpn60	619943	23.33
619943_24243604_16SrX-AT_cpn60_1_9	AAAAGATATAAAAATGAAAGATTTAGGTAATGTTCATAAAGCATTAATTAAAAAAGACAACACTGTATTAGTTGGAGCTCAAAAAACTTCCGCTTTAAAAGAAAGAATTAAAGAAATAGA		920	1040	-	16SrX-AT_cpn60	619943	24.17
619943_24243604_16SrX-AT_cpn60_1_10	ATAGAAATCCAATGTGCTAATGCTGATAACGAATTTGAAAAAAATAACTTAAAAGAAAGATTAGCTAAATTATCAGGAGGAGTCGCTTTAATTAAAGTTGGAGCAGCTACTGAAACAGAA		1035	1155	-	16SrX-AT_cpn60	619943	30.83
619943_24243604_16SrX-AT_cpn60_1_11	CAGAATTAAAAGAAAAAAAATTAAGAATTGAAGATGCTTTAAATGCTACCAAAGCAGCTATAACTGAAGGAATTGTTGTAGGTGGAGGTAAAGCTTTAATAGAAATTTATAAAGAATTAA		1150	1270	-	16SrX-AT_cpn60	619943	26.67
619943_24243604_16SrX-AT_cpn60_1_12	ATTAAACGTTAACTTAACTGATTCTAATCCAGATATACAAAAAGGGATTAATGTAGTTATTGAAAGTCTTTTAGCACCAACATATCAAATTGCAGAAAATGCAGGTTTTGATGGTGATCA		1265	1385	-	16SrX-AT_cpn60	619943	30
619943_24243604_16SrX-AT_cpn60_1_13	GATCACGTAATTCGTAAACAATTATCCGAACCAGAAAATTTTGGATTTGATGCCAAAGAAGGTATTTATACTAATTTATTAAAAAAAGGTATTATTGATCCAACCAAAGTTGCTCGTCAA		1380	1500	-	16SrX-AT_cpn60	619943	30
619943_24243604_16SrX-AT_cpn60_1_14	GTCAAGCAGTTATAAATGCAGCTTCTATTGCTTCGTTAATAATAACTACTGAAGCAGCAGTAGTAACAATAAAAGAGAACAATAATAAAGAAAATTCTATGATGATGCCAGAATAA		1495	1611	-	16SrX-AT_cpn60	619943	30.17
619943_24243605_16SrX-AT_tuf_1_1	ATGTCTAGTAAAGTATTTTTAAGAGATAAAGTGCATGTTAATGTAGGAACTATTGGTCATGTTGATCATGGAAAAACTACTTTGACTGCTGCTATTACTAAAATTTTATCAACAAAAGGC		0	120	-	16SrX-AT_tuf	619943	30
619943_24243605_16SrX-AT_tuf_1_2	GCTTAGCAGAAAATAAATCATATGATCAAATTGATAAAACTAAAGAAGAAAAAGAACGTGGTATAACTATTAACACTACCCATGTTTCTTATGAAACTGAAAAAAGGCATTATGCTCATG		118	238	-	16SrX-AT_tuf	619943	29.17
619943_24243605_16SrX-AT_tuf_1_3	TGTTGATTGTCCTGGACACGCTGATTATGTTAAAAATATGATTACGGGTGCTGCGCAAATGGACGCTGGTATTTTAGTTGTTTCAGCTTATCATGGAGTAATGCCTCAAACTCGTGAACA		236	356	-	16SrX-AT_tuf	619943	40.83
619943_24243605_16SrX-AT_tuf_1_4	CATGTTTTGTTAGCTGGACAAGTTGGTATCTCTAAATTGATAGTATTTTTAAATAAATGTGATTTAGTTAAAGAAGAAGAATGGATTCATTTAGTAGAAATGGAAGTTCGTGAATTATTA		354	474	-	16SrX-AT_tuf	619943	26.67
619943_24243605_16SrX-AT_tuf_1_5	TAAACGAATATAAATTTGATGGTGATAAAACTCCTTTTGTTAGAGGTTCAGCTTTAAAAGCTTTAGAAGGCACAGATGTTGAAGGTATCAATAAATTATTAGAAGTTTTAGATGAATATA		472	592	-	16SrX-AT_tuf	619943	27.5
619943_24243605_16SrX-AT_tuf_1_6	TATTGAAGATCCAATTCGTGATGTAGAAAAACCATTTTTAATGCCGGTTGAAGGAGTTCATACTATTACTGGTCGTGGAACTGTTGCTACTGGTCGTGTAGAAAGAGGAAAAATTAAGAT		590	710	-	16SrX-AT_tuf	619943	36.67
619943_24243605_16SrX-AT_tuf_1_7	ATTAGTGAAGAAGTTGAAATTATTGGTTTAAAAGAAACTAAAAAAGCTATTATTACTGGTCTTGAAATGTTTAAAAAAGAATTAGATTTTGCTCAAGCTGGTGATAATGTTGGTATTTTA		708	828	-	16SrX-AT_tuf	619943	25
619943_24243605_16SrX-AT_tuf_1_8	TATTACGCGGTATTACTCGTGATCAAATTGAAAGAGGTCAAGTTTTAGCTAAACCAGGTTCTTTAAATGCTTATCATAAATTTTTGTCTCAAGTTTATATTTTGACTCAACAAGAAGGTG		826	946	-	16SrX-AT_tuf	619943	31.67
619943_24243605_16SrX-AT_tuf_1_9	TGGACGTCATACTGCATTTTTTTCTAATTACAGACCACAATTTTATTTTCGTACTACAGATGTTACTGGTTTCATTAAATTAAAAAAAGATGTTAAAATGGTATTACCAGGTGATAGAAC		944	1064	-	16SrX-AT_tuf	619943	29.17
619943_24243605_16SrX-AT_tuf_1_10	ACAGAACTTATTGTTGAATTAAATCATCCAATCGCTATTGAAGCAGGCACTAAATTTTCTATTCGTGAAGGTGGACGCACAATAGGAGCTGGTACAGTAACTGAAATTATTGAATAA		1062	1179	-	16SrX-AT_tuf	619943	35.04
619943_24243606_16SrX-AT_secY_1_1	ATGTTAAAAAAAATAAAATTAATTTTTAATAGTAAATTAATTTTCAGATTCATTTTCACTTTATTTATTATTTTTATTTTTATTTTAGGACGTAGTATACAAATCCCTTTTTTAAATGTA		0	120	-	16SrX-AT_secY	619943	14.17
619943_24243606_16SrX-AT_secY_1_2	TAAATGTACAAATACAAACTATTATTCAATTATTGAAAGGTTTGACTACATCTGATAAATTTTTAATTAATTTTGATCTTAATAATTTTAATTTATTATCTTTAAGCATATATCCTTATA		112	232	-	16SrX-AT_secY	619943	16.67
619943_24243606_16SrX-AT_secY_1_3	TCCTTATATTACTATTTCTATTTTTATTCAATTGGTTCAAAAATTCATTCCTCATTTGAAAGAATGGCGTGAACAAGGCGAAGTTGGAAAACAAAAATTAAATCGTTTAACTCGTTTTTT		224	344	-	16SrX-AT_secY	619943	27.5
619943_24243606_16SrX-AT_secY_1_4	CGTTTTTTAGCTATTTTATTAGCTATGTTTCAAAGTTATTTAATGATTAATAAATATAGTGGTAATAAAGAAAGTGGTGGTGAGATATTTATTGGAGAAAAGTTATATATATCGTTTTTT		336	456	-	16SrX-AT_secY	619943	22.5
619943_24243606_16SrX-AT_secY_1_5	CGTTTTTTTTAGCTACCGGAACAGCTATTGCTATTTGGTTATCTGATTTAATTACAGCCAAAGGGGTTGGTAATGGAACTTCAATTTTAATTATGGTTGGAATGAGTAGTGGAGTAATTA		448	568	-	16SrX-AT_secY	619943	34.17
619943_24243606_16SrX-AT_secY_1_6	AGTAATTACTACTTTTCAAAAAATATTTGCATTTTGGAATACAGACAAAATTAAATTTTTTGCTTTATTGTTTTTTTTATTATTTATTTTAATATCTACTATTATAGTTTATTTAGCTAC		560	680	-	16SrX-AT_secY	619943	16.67
619943_24243606_16SrX-AT_secY_1_7	TTAGCTACTTTAAAAATTCCTATTATTTATCCTAATAAAAAAAGTCAAGTAGAAAATTATATTCCTTTAAAAATTAATGTTCCTGGTGTATTGCCAATTATTTTAACATCCACAATGCAA		672	792	-	16SrX-AT_secY	619943	23.33
619943_24243606_16SrX-AT_secY_1_8	CAATGCAAGCATTTTTTATGTTTTGTATTAATAATATACCATTTTTTAATCAATTAAAATGTAAAGATAAAATTATAGAGTTTATTAGTATATCTACTAATTTAGGAATTATTTTTTTTG		784	904	-	16SrX-AT_secY	619943	16.67
619943_24243606_16SrX-AT_secY_1_9	TTTTTTTGTTTGTTTAATAATTTTCTTCTCTTTTTTAACTGCTTTTTTAATTGTAAATACTAATGATATTGCCGAACATTTATCTAAACAAGATGCTTATATTGAAAATTGTAGACCAGG		896	1016	-	16SrX-AT_secY	619943	23.33
619943_24243606_16SrX-AT_secY_1_10	AGACCAGGTAAACAGACTGTGGAAAAAATATCTTATGATTTTTTCAGAATTACTATTATTGGTGTTTTTTTTATGATTTTTTTATTTGTATTACCTCTGTTAATTAGTAAAGGTTTTGAT		1008	1128	-	16SrX-AT_secY	619943	24.17
619943_24243606_16SrX-AT_secY_1_11	GTTTTGATTTTAAGGAATTTAAAATAGGGGGAACAGGATTTTTAATTATTGTTGGTGTTTCTATTGAAACTTTACAACAAATTAGTTCTACTGCCAATAAAGAAGATTATGCAAAAATTT		1120	1240	-	16SrX-AT_secY	619943	25.83
619943_24243607_16SrX-AT_secA_1_1	ATGTTTAATATTTTAAAAAAAATATTTAATTCTTCTAGAAAATATTTAAAAAAAGCTAAAATTTTAGCTGATCAAATTAATAAATTAGATGAAAAAATGACAAAATTAAAAGATGAAGAT		0	120	-	16SrX-AT_secA	619943	14.17
619943_24243607_16SrX-AT_secA_1_2	TTCAAAAAAGAAACTCTAAGATTAAAAAATATTTTTTGTCAAAAAAAAAATTTAGATGAACTTTTAGTTGAGGCTTACGCTTTAGCTAGGGAAGCTAGTTATAGAATTACTGGAATGAAA		120	240	-	16SrX-AT_secA	619943	25.83
619943_24243607_16SrX-AT_secA_1_3	CCTTATTATGTACAACTTTTGGGAGCTATTATATTGCATCAAGGTAATGTAGCAGAAATGAAAACTGGAGAAGGGAAAACTTTAACTGCTATTATGCCATCTTATTTGAATTCTTTAAGT		240	360	-	16SrX-AT_secA	619943	31.67
619943_24243607_16SrX-AT_secA_1_4	GGTCAAAGTGTACATATTGTTACTGTTAATGAGTATTTAGCTAGTCGTGAAGCTGAAGGCATTATAAGTAAAGTTTTTAATTTTTTAGGATTATCTGTTGGTTTAAATACTAAAAATAAA		360	480	-	16SrX-AT_secA	619943	26.67
619943_24243607_16SrX-AT_secA_1_5	AATAATATAGAAAAAAAACAAGCTTATGATTGTGATATTCTTTATTCTACAAACAGTGAATTATCTTTTGATTATTTAAGAGATAATATGCAAATTGATTGTAAAAATTTAGTTATGCAA		480	600	-	16SrX-AT_secA	619943	20
619943_24243607_16SrX-AT_secA_1_6	AGAGATTATGGTTATGCTATTGTTGATGAAGTTGATTCTATTTTAATAGATGAAGCTAGAACTCCTTTAATAATTTCAAATCAAAATAGGCAAACTGAATTTATTTATCGTGAAGCCGAT		600	720	-	16SrX-AT_secA	619943	28.33
619943_24243607_16SrX-AT_secA_1_7	CGTTTTGTAAGAACTTTAAAAAACAATCATTATATAATTGATTTAGAAACTAAAACTATTGAATTAACTGAAAAAGGTATAAATAAAGCAGAAAATTTTTTTCAAATAAATAATTTATAT		720	840	-	16SrX-AT_secA	619943	16.67
619943_24243607_16SrX-AT_secA_1_8	AATGTTAATCATGCTCCTTTATTACATCGTATAAAAAATGCTTTAAAAGCTTTTTTTCTAATGCACAACAATAAAGATTATTTAGTTGTTAAAGATCAAATATTGATTATTGATGAATTT		840	960	-	16SrX-AT_secA	619943	21.67
619943_24243607_16SrX-AT_secA_1_9	ACGGGTAGAATTTTAAAAGGTCGTCAATTTAGTAATGGTTTACATCAAGCTTTAGAGGCTAAAGAAAGAGTTACTATTAAACCTGAGACTACTATTTCAGCCACTATTACTTATCAAAAT		960	1080	-	16SrX-AT_secA	619943	31.67
619943_24243607_16SrX-AT_secA_1_10	TTTTTTCGTCTTTATAAAAAAATATCTGGAATGACAGGAACAGCTAAAACCGAAGAAGATGAATTTCGTAATATTTATAATATGGAAGTAATAGAAATTCCAACTAATAAACCTATGATT		1080	1200	-	16SrX-AT_secA	619943	25.83
619943_24243607_16SrX-AT_secA_1_11	AGAATAGATGATCCAGATTTTATTTTTACAAATTTAAATGAAAAATGGAAATATTTAATTGAAGATGTTAAAAATAGACATAAAAAAGGACAACCTGTTTTAATAGGTACTATTACTGTT		1200	1320	-	16SrX-AT_secA	619943	21.67
619943_24243607_16SrX-AT_secA_1_12	GAAATATCAGAACAAATTTCTAAAAAATTACATAAACACAATATTACACATGAAGTTTTGAATGCTAAGAATCACATAAGAGAAGCAGAAATAATTTCTAAAGCCGGCATTAAAGGTTCT		1320	1440	-	16SrX-AT_secA	619943	27.5
619943_24243607_16SrX-AT_secA_1_13	GTTACTATTGCTACTAATATGGCAGGTCGTGGAACTGATATTATTTTGGGTAAAGGTGTAATTGAATTAGGCGGTTTGGCTGTTATAGGTACTGAAAAACACGAATCAAGAAGGATTGAT		1440	1560	-	16SrX-AT_secA	619943	36.67
619943_24243607_16SrX-AT_secA_1_14	CATCAGTTAAGAGGTAGAGCAGGTCGTCAAGGTGATCCTGGTTATTCTCGTTTTTTTATTTCTGGCGAAGATGATTTATTACAACGTTTTGGTGGTTCTAAATTACAATATATTATAGAA		1560	1680	-	16SrX-AT_secA	619943	34.17
619943_24243607_16SrX-AT_secA_1_15	TTGTTGAAAAAAATTAATATTTCAGAAAATAAAATGACTTCTTCTAAATTAATAACTAGATTTTTGATTAATATTCAAAAAAAGATTGAATCCAGTAATTTTGATTATCGTAAATATATT		1680	1800	-	16SrX-AT_secA	619943	16.67
619943_24243607_16SrX-AT_secA_1_16	TTAAAATACGATGATATTTTAAGAATTCAAAGAGAAATTATTTATAAACAAAGAAAAGAAGTTTTATTTTGTGATGAAATAAAAAAATTAGTTTTTAATTTAGTAGAAAAAACTTTAAAT		1800	1920	-	16SrX-AT_secA	619943	15
619943_24243607_16SrX-AT_secA_1_17	TATCAAATTAGTTATTATTTTAAAAATTCTAATATAAATATTAAAAAACAAAATTATTTAGAAGATTTAATTCATTATTTAGAATTACATTTTTTTAATAGAAATGTTTTATATTTATCA		1920	2040	-	16SrX-AT_secA	619943	10
619943_24243607_16SrX-AT_secA_1_18	GAAATCAAACATTTAATAGAAAATAATAAAAATGTTAATATTGAAAAAATAATTATTGATTATGTTCAAAATAAAGCTAAAAATATTTTATTATTACCACCTAAAGAATTAATTTCTGAA		2040	2160	-	16SrX-AT_secA	619943	15
619943_24243607_16SrX-AT_secA_1_19	CATCAACAAAATTTTATAGAAAGAACAAGATTAAAAATTTTAAAAATCATCGATTATCATTGGAGTTTACATATTAATAATATGGAGTATTTACGAAAAGGGGCAAGTTTTTTGAATTAT		2160	2280	-	16SrX-AT_secA	619943	22.5
619943_24243607_16SrX-AT_secA_1_20	GGACAACAAAACTCTTTGATTTCTTATCAAAAAGAAGGTAGATTGTTATTTAATCAAATGATACAACAAATTTCTTTTGATATTACTAAAATATTATTAAAAATTCCTATTTAA		2280	2394	-	16SrX-AT_secA	619943	20.18
619943_24243608_16SrX-AT_NusA_1_1	TTGAATAGTAAAGATTTTTTTAATATTATTAGTGAGTTTGCTGAAGAAAATGAATTAACTAAGGAACAAATAAAAGATGCTTTTACGAAAGCTCTTATTTATGGTTGTAGAAAAGCACAT		0	120	-	16SrX-AT_NusA	619943	25
619943_24243608_16SrX-AT_NusA_1_2	AAGATTAAATCTTGTAAAGTTGATATTAAAGAAGATCGCAATGAAATAAATTTATATAAGCAATATTATATAATTGATCCAGAAGAACAATATTTAAATAATTACAAAGATTATACTCAC		120	240	-	16SrX-AT_NusA	619943	20
619943_24243608_16SrX-AT_NusA_1_3	ATTGATTTAGAAGAAGCAAAAAAAATTAAAAAAAGAGTCAAAGTAGGTCAAATTATTAATATTAAGACTAATCCTAAAGATTTTAACCTTTATGCTGTTAAAGATTTTAAAAATAAATTT		240	360	-	16SrX-AT_NusA	619943	19.17
619943_24243608_16SrX-AT_NusA_1_4	AAAGAAGAATTAACTAAACAAAAAAGAGAAAATATTTATGATTATTTTAAAAGTTATGAAGGTAAATTGATTAATGCGAAAGTTATTGGTTCTAATAGTAAATTTTATTATCTAGAATTG		360	480	-	16SrX-AT_NusA	619943	19.17
619943_24243608_16SrX-AT_NusA_1_5	GAAAAAGAAATGACTACTTTGTTGCCTAAAAAAGAAACTTTAAATAAAGAAATTTTTGCCGAAGGTGATCGTATTAGAGTTTATATAGTTGAAGTTCAAAAAACTACTAAATTACCACGA		480	600	-	16SrX-AT_NusA	619943	27.5
619943_24243608_16SrX-AT_NusA_1_6	ATTTTTGTAAGTCAAACTCATATTGGTTTAGTGACTAAAATTTTTGAAGATTGGATTCCTGAAATTAATGATGGTACTTTAAAAATTATGATGATTGCTAGAATTCCAGGCGAAAGAACT		600	720	-	16SrX-AT_NusA	619943	28.33
619943_24243608_16SrX-AT_NusA_1_7	AAGATAGGGTTATTTTCTAATAATCCTCAAGTCGATCCGATTGGTTCTTGTATTGGTAAAAACGGTAATCGTATTAAGAGTATTATTAAACTTTTACAAGGAGAAAAAATTGATTTGTTT		720	840	-	16SrX-AT_NusA	619943	28.33
619943_24243608_16SrX-AT_NusA_1_8	TTATGGAGCGAAAAAAATGAAGAATTAATTTCTAATTCTTTACAACCAGCTAAAATATTTCAAGTAAATATTAAGAATTTAGAAAATAAAAAAGCTTTGGTAATTGTAGAAGATGATCAA		840	960	-	16SrX-AT_NusA	619943	22.5
619943_24243608_16SrX-AT_NusA_1_9	CTATCTTTAGCAATTGGTAAATTAGGTAAAAATGTGAAATTAGCTGCTCAAGCTACTAAATGGAATATTGATATTAAAACTTTATCTCAATTAAAAAAAATAAAAACAATGACTTAA		960	1077	-	16SrX-AT_NusA	619943	23.08
619943_24243609_16SrX-AT_rp_1_1	TTAGGAGAATTTTCTCCAACACGAACTTATCGTGGACATGATAAAAAAGATAAAAAAATTCAAAAAAAATAGTAGAAAGGAATAAAAAAATGATTTCTAAAGCTATTATAAAAAAAGTAT		0	120	-	16SrX-AT_rp	619943	22.5
619943_24243609_16SrX-AT_rp_1_2	AAAAAGTATCAATTGCTCCTCGAAAAGCACGTTTAGTAGTTGATTTAATTCGTGGTAAAGAAATTAAAGTAGCTAAAGCTATTATAATGTTTACTCCTAAATCAGCTTCAAGTATTGTTT		111	231	-	16SrX-AT_rp	619943	29.17
619943_24243609_16SrX-AT_rp_1_3	GTATTGTTTTAAAACTTTTAAATAGTGCTGAAGCTAATTTGGCGCAAAATATTAATTTAAAATCTAATGATTTTTATATTTCTGAAGTTTATGTTAATGAAGGAATACGTTTAAAACGTT		222	342	-	16SrX-AT_rp	619943	22.5
619943_24243609_16SrX-AT_rp_1_4	TAAAACGTTTGTTTCCGCGAGCTAAAGGTTCAGGTGATATGATTAAAAAAAGAACTAGTCATATTGTTTTAAAATTATCTATGGCAAAAGAAATTAAAGAAGAAATTAAAGCTAAAAAAA		333	453	-	16SrX-AT_rp	619943	25.83
619943_24243609_16SrX-AT_rp_1_5	CTAAAAAAAAGGAGGTTAATATTCATGGGACAAAAATCTAATCCTAATGGTTTAAGATTAGGTATTATTAAAAATTGGGATTCTAAATGGTTTGCAAATTTTAAAAAAACTCCACAATTT		444	564	-	16SrX-AT_rp	619943	25
619943_24243609_16SrX-AT_rp_1_6	CCACAATTTATTCATGAAGATTTTTGCATTCGTAATTTTATTAATAAAAATTACTCTAAGGCTTTAATTGCTCAAATTGAAATTGAGCGTAGTAAGAAAAAAGATAAAGAAATTATTAAA		555	675	-	16SrX-AT_rp	619943	22.5
619943_24243609_16SrX-AT_rp_1_7	ATTATTAAAATTAATTTACATGTTGCTAAATCTAATATAATTAACGGGAAAGATAATGAATCACTGAAAAAAATTACTAAACAAATAGAACAAATAACAAAAAAAGAAGTATTTTTTAAT		666	786	-	16SrX-AT_rp	619943	17.5
619943_24243609_16SrX-AT_rp_1_8	TTTTTTAATGTTATAGAAATTAAAAATCCTGATAAAGTAGCTATTTTAGTAGCAAAAACAATGGCTGAACAATTAGAACAGCGTTTTTATTTTAGACGTGTACAAAAAATGGCCATTCAA		777	897	-	16SrX-AT_rp	619943	26.67
619943_24243609_16SrX-AT_rp_1_9	GCCATTCAAAAAGTTTTAAAAACAGGAGTTAAAGGTGTTAAAACTTTAATTTCCGGTCGTTTAGGTGGTTTAGAAATGGCCCGTAGTGAAGGTTATTTAGAAGGTAGAGTTCCACTTAAT		888	1008	-	16SrX-AT_rp	619943	35
619943_24243609_16SrX-AT_rp_1_10	CCACTTAATACTTTACGAGCAGATGTTGAGTATGCATTTACAGAAGCTCATACAACTTACGGATCTTTTGGTGTTAAAGTATGGATTTTTCATGGTGATGTTTTACCAGGCGAAACTATT		999	1119	-	16SrX-AT_rp	619943	35.83
619943_24243609_16SrX-AT_rp_1_11	GAAACTATTTTAGATACTAGAAAACCTTTTGCTATAAAAAGCAATTATATTTCTAAAAATAATAAAAAAAGCAATAATTATAAAGGTGATAAATAATTATGTTAATGCCAAAAAGAAC		1110	1228	-	16SrX-AT_rp	619943	19.49
619943_24243610_16SrXII-284-09_16S-23S_1_1	TGCCTAATACATGCAAGTCGAACGGAAGTTTAAGCAATTAAACTTTAGTGGCGAACGGGTGAGTAACGCGTAAGCAATCTGCCCCTAAGACGAGGATAACAGTTGGAAACGACTGCTAAG		0	120	-	16SrXII-284-09_16S-23S	619943	45
619943_24243610_16SrXII-284-09_16S-23S_1_2	TGCTAAGACTGGATAGGAGATAAGAAGGCATCTTTTTATTTTTAAAAGACCTAGCAATAGGTATGCTTAAGGAAGAGCTTGCGTCACATTAGTTAGTTGGTGGGGTAATGGCCTACCAAG		113	233	-	16SrXII-284-09_16S-23S	619943	40
619943_24243610_16SrXII-284-09_16S-23S_1_3	TACCAAGACGATGATGTGTAGCCGGGCTGAGAGGTCGAACGGCCACATTGGGACTGAGACACGGCCCAAACTCCTACGGGAGGCAGCAGTAAGGAATTTTCGGCAATGGAGGAAACTCTG		226	346	-	16SrXII-284-09_16S-23S	619943	55
619943_24243610_16SrXII-284-09_16S-23S_1_4	AACTCTGACCGAGCAATGCCGCGTGAACGATGAAGTATTTCGGTACGTAAAGTTCTTTTATTAGGGAAGAAAAGATGGTGGAAAAACCATTATGACGGTACCTAATGAATAAGCCCCGGC		339	459	-	16SrXII-284-09_16S-23S	619943	43.33
619943_24243610_16SrXII-284-09_16S-23S_1_5	CCCCGGCTAACTATGTGCCAGCAGCCGCGGTAATACATAGGGGGCAAGCGTTATCCGGAATTATTGGGCGTAAAGGGTGCGTAGGCGGTTAAATAAGTTTATGGTCTAAGTGCAACGCTC		452	572	-	16SrXII-284-09_16S-23S	619943	51.67
619943_24243610_16SrXII-284-09_16S-23S_1_6	AACGCTCAACGTTGTGATGCTATAAAAACTGTTTAGCTAGAGTTGGATAGAGGCAAGTGGAATTCCGTGTGTAGTGGTAAAATGCGTAAATATACGGAGGAACACCAGAAGCGAAGGCGG		565	685	-	16SrXII-284-09_16S-23S	619943	44.17
619943_24243610_16SrXII-284-09_16S-23S_1_7	AAGGCGGCTTGCTGGGTCTTAACTGACGCTGAGGCACGAAAGCGTGGGGAGCAAACAGGATTAGATACCCTGGTAGTCCACGCCCTAAACGATGAGTACTAAACGTTGGATAAAACCAGT		678	798	-	16SrXII-284-09_16S-23S	619943	50.83
619943_24243610_16SrXII-284-09_16S-23S_1_8	AACCAGTGTTGAAGTTAACACATTAAGTACTCCGCCTGAGTAGTACGTACGCAAGTATGAAACTTAAAGGAATTGACGGGACTCCGCACAAGCGGTGGATCATGTTGTTTAATTCGAAGG		791	911	-	16SrXII-284-09_16S-23S	619943	43.33
619943_24243610_16SrXII-284-09_16S-23S_1_9	TCGAAGGTACCCGAAAAACCTCACCAGGTCTTGACATGCTTTTGCAAAGCTGTAGAAATACAGTGGAGGTTATCAGAAGCACAGGTGGTGCATGGTTGTCGTCAGCTCGTGTCGTGAGAT		904	1024	-	16SrXII-284-09_16S-23S	619943	48.33
619943_24243610_16SrXII-284-09_16S-23S_1_10	GTGAGATGTTGGGTTAAGTCCCGCAACGAGCGCAACCCTTGTTGTTAATTGCCATCATTAAGTTGGGGACTTTAGCAAGACTGCCAATGATAAATTGGAGGAAGGTGGGGACGACGTCAA		1017	1137	-	16SrXII-284-09_16S-23S	619943	47.5
619943_24243610_16SrXII-284-09_16S-23S_1_11	ACGTCAAATCATCATGCCCCTTATGACCTGGGCTACAAACGTGATACAATGGCTGTTACAAAGGGTAGCTAAAGCGTAAGCTTCTGGCGAATCTCAAAAAAGCAGTCTCAGTTCGGATTG		1130	1250	-	16SrXII-284-09_16S-23S	619943	45
619943_24243610_16SrXII-284-09_16S-23S_1_12	CGGATTGAAGTCTGCAACTCGACTTCATGAAGTTGGAATCGCTAGTAATCGCGAATCAGCATGTCGCGGTGAATACGTTCTCGGGGTTTGTACACACCGCCCGTCAAACCACGAAAGTTG		1243	1363	-	16SrXII-284-09_16S-23S	619943	50
619943_24243610_16SrXII-284-09_16S-23S_1_13	AAAGTTGGCAATACCCAAAGCCGGTGGCCTAACTTGAGCAATCAAGAAGGAGCCGTCTAAGGTAGGGTTGATGATTGGGGTTAAGTCGTAACAAGGTATCCCTACCGGAAGGTGGGGATG		1356	1476	-	16SrXII-284-09_16S-23S	619943	50
619943_24243610_16SrXII-284-09_16S-23S_1_14	GGGGATGGATCACCTCCTTTCTAAGGATAAAGTTATCATCTTCAGTTTTGAGAGACTTAAGAAAGTTTTTCATTTTTTAAGATTCGGGCCTATAGCTCAGCTGGTTAGAGCACACGCCTG		1469	1589	-	16SrXII-284-09_16S-23S	619943	40.83
619943_24243610_16SrXII-284-09_16S-23S_1_15	ACGCCTGATAAGCGTGAGGTCGGTGGTTCAAGTCCATTTAGGCCCACCAAAATAGGTCACATCTTAAAAAAGCTCTTTGAAAAGTAGATAAACAAAGGTTAGAAAATTAAAGGAACTAAG		1582	1702	-	16SrXII-284-09_16S-23S	619943	38.33
619943_24243611_16SrXII-284-09_cpn60_1_1	ATGAGTAAACAAATATTTTACGGCAAGGACGCAAGAAAAGCTTTGTTGCAAGGAGTTGATGCGATTGCCAACACTGTTAAAGTGACTTTAGGACCGAAAGGACGAAACGTTATTTTAGAA		0	120	-	16SrXII-284-09_cpn60	619943	38.33
619943_24243611_16SrXII-284-09_cpn60_1_2	TTAGAAAAGCCTTATGAAAGTCCTGCGATTGTCAACGATGGCGTGTCAATTGCAAAAGAAATCGAATTAAAAAATCCTTACCAAAATATGGGAGCTAAATTAGTTTATGAAGTGGCAGCC		114	234	-	16SrXII-284-09_cpn60	619943	36.67
619943_24243611_16SrXII-284-09_cpn60_1_3	GCAGCCAAAACTAACGATCGAGCAGGAGATGGTACTACGACAGCAACAGTATTAGCGCAAAGTATGATTCATCGTGGTTTTAAAGCGATTGACTCAGGAGCAAATCCGATGCTAGTTAAA		228	348	-	16SrXII-284-09_cpn60	619943	43.33
619943_24243611_16SrXII-284-09_cpn60_1_4	GTTAAAGAAGGGATCGAACTTGCTGCTCAAACAGTTGCACAAAAACTTTTAGCCAAATCCAAAAAAGTAGAAGGTCAAGAAGATATTCAAAATGTAGCCGCTATTTCTGCCGGTAGTGGA		342	462	-	16SrXII-284-09_cpn60	619943	39.17
619943_24243611_16SrXII-284-09_cpn60_1_5	AGTGGAGAAATTGGTAAAATTATTGCTCAAGCGATGGAAAAAGTGGGCAAAAACGGCGTGATTAATGTCGATGAGTCCAAAAGTTTTGAAACCAATTTAGAAGTGGTACAAGGTTTGGAG		456	576	-	16SrXII-284-09_cpn60	619943	38.33
619943_24243611_16SrXII-284-09_cpn60_1_6	TTGGAGTATGATAAAGGTTATGCTTCACCTTATTTTGTCTCCGACAGAGAAAGTATGACAATTGAATTAAATCAACCTTTAGTTTTAATAACTGATCATAAAATTAGCACGATCCAAGAA		570	690	-	16SrXII-284-09_cpn60	619943	30.83
619943_24243611_16SrXII-284-09_cpn60_1_7	CAAGAAATTTTACCTCTTTTAGAAGGAGTGGTCAAAGAATCAAAAACTTTATTGATCATCGCTGAAGCAGTTGAAAACGAAGTTTTGGGAGTCTTAGTTGCTAATAAATTGAGAGGAACT		684	804	-	16SrXII-284-09_cpn60	619943	34.17
619943_24243611_16SrXII-284-09_cpn60_1_8	GGAACTTTTAATGTTGTAGTCACCAATGCCCCTGGTTTTGGCGATAACCAAAAAGAAATTTTACAAGATATCGCGATTTTAACGCAAGGAACTTTCATTTCCAAAGACCTTAATATGAAA		798	918	-	16SrXII-284-09_cpn60	619943	35
619943_24243611_16SrXII-284-09_cpn60_1_9	ATGAAATTAACCAATGTTAAAACAAGCGATTTAGGCAACATTAACAAAGTTATTATCAAAAAAGATAACACTACTTTAGTAGGGGCTGCAACAAGTCAGGCTTTAGAACAACGCATTGCT		912	1032	-	16SrXII-284-09_cpn60	619943	33.33
619943_24243611_16SrXII-284-09_cpn60_1_10	ATTGCTTTGTTACAAACACAAATCAAAAATTCAACCGTTGATTATGAGACTAAAACCTTACAAGAAAGACTAGCCAAATTAACAGGCGGAATTGCTTTGATCAAGGTAGGAGCTACAACT		1026	1146	-	16SrXII-284-09_cpn60	619943	35
619943_24243611_16SrXII-284-09_cpn60_1_11	ACAACTGATACTGAATTAAAAGACAAAAAATTACGTTTAGAAGATGCTTTAAACGCTACTAAAGCGGCTATTACCGAAGGAACAGTTGTAGGCGGCGGTAAGGCATTAGTCGAAGTTTAT		1140	1260	-	16SrXII-284-09_cpn60	619943	37.5
619943_24243611_16SrXII-284-09_cpn60_1_12	GTTTATCAAGAATTAAAAGACAATTTAGCTAGTGATAATAAAGAGGTACAAAAAGGGATTAATGTCGTTGTTGAAAGTCTTTTAACTCCGACTTATCAAATCGCTGAAAATGCTGGCTTT		1254	1374	-	16SrXII-284-09_cpn60	619943	31.67
619943_24243611_16SrXII-284-09_cpn60_1_13	GGCTTTGATGGTGATCATATTGTTAGACAACAATTAAACCAAAAATTGAATTTTGGTTTTAATGCTAAAAGTGGTCAATACGTTGATTTATCGCAAGCAGGCATTATTGACCCTACTAAA		1368	1488	-	16SrXII-284-09_cpn60	619943	32.5
619943_24243611_16SrXII-284-09_cpn60_1_14	ACTAAAGTCACTCGTCAAGCTATCTTAAATGCTGCTTCGATTTCGGCTTTGATGATTACGACCGAAGCTGCTGTTGTTAGTTTAAAAGACGATAAACAAAGTGATATGGGTATGTCAGAA		1482	1602	-	16SrXII-284-09_cpn60	619943	38.33
619943_24243612_16SrXII-284-09_tuf_1_1	ATGGCTAATGAAAAATTTATAAGAAATAAACCTCATTTAAACGTAGGAACAATTGGGCACGTTGATCACGGCAAAACTACTTTAACAGCTGCCATCACTCAAGTGTTAGCTTCTCAAGGG		0	120	-	16SrXII-284-09_tuf	619943	37.5
619943_24243612_16SrXII-284-09_tuf_1_2	GGTTAGCTAAAAGTAGAGCTTATGACCAAATTGATAACGCTCCTGAAGAAAGAGAACGTGGAATTACGATTAAAACTTCTCACGTTGAATATGAAACATCAAAAAGACACTATGCTCACG		118	238	-	16SrXII-284-09_tuf	619943	36.67
619943_24243612_16SrXII-284-09_tuf_1_3	CGTTGATTGTCCAGGACACGCCGATTATATTAAAAACATGATTACTGGTGCTGCTCAAATGGATGCCGCTATTTTAGTAGTTTCTGGCGCAGATAGTGTTATGCCTCAAACTAGAGAACA		236	356	-	16SrXII-284-09_tuf	619943	41.67
619943_24243612_16SrXII-284-09_tuf_1_4	CATATTTTGTTAGCTCGCCAAGTAGGGGTTCCTAAAATTGTTGTTTTCTTAAACAAATGTGACCTTTGTCCGGATGAAGAAATTTTAGAATTAGTTGAAATGGAAGTCCGTGAATTATTA		354	474	-	16SrXII-284-09_tuf	619943	33.33
619943_24243612_16SrXII-284-09_tuf_1_5	TATCTAAATATGATTTTCCGGGCGATGATACCCCTATTATTAGAGGTTCTGCGTTAAAAGCTTTAGAAGGTGACAAACATTACATTGCACAAGTTAACGAATTAATCAACGCTTTAGATT		472	592	-	16SrXII-284-09_tuf	619943	34.17
619943_24243612_16SrXII-284-09_tuf_1_6	TTCTTACATTGAAGATCCAGTGCGTGAAGTTGATAAACCTTTCTTAATGCCAGTCGAAGATGTTTTCACTATCACTGGTAGAGGAACAGTAGTTACTGGTAGAGTTGAAAGAGGACAAGT		590	710	-	16SrXII-284-09_tuf	619943	39.17
619943_24243612_16SrXII-284-09_tuf_1_7	GTTAAAGCTGGTGATGAAATAGAAATCATAGGTCTTAAAGACACTAGAAAAACCATCGTAACAGCAATTGAAATGTTTAAAAAAGATTTAGATTTTGCTCAAGCAGGCGATAACGTTGGA		708	828	-	16SrXII-284-09_tuf	619943	33.33
619943_24243612_16SrXII-284-09_tuf_1_8	GAGCTTTGTTGCGTGGAATTAACCGTGAAGATGTTCAACGTGGTCAAGTGTTAGCCAAACCAGGTTCTGTGAAACCTCATTTTCAATTTGTGGCGCAAGCTTATATCTTAACTAAAGAAG		826	946	-	16SrXII-284-09_tuf	619943	40.83
619943_24243612_16SrXII-284-09_tuf_1_9	AGAAGGAGGACGACACACTGCCTTTTTTTCCCAATACCGTCCGCAATTCTATTTCCGTACAACTGATATTACAGGAGTTGTTGAATTACAAGGTGATGTTAAAATGGTTATGCCAGGTGA		944	1064	-	16SrXII-284-09_tuf	619943	40.83
619943_24243612_16SrXII-284-09_tuf_1_10	GACAACGTTGAATTAACTGTTACTTTAAACAATCCGATTGCAATTGAAGAAGGCACTAAGTTTTCTATCCGTGAAGGTGGAAAAACAGTTGGCGCTGGATCAGTTTCAAAAATTCTTAAA		1062	1182	-	16SrXII-284-09_tuf	619943	35.83
619943_24243613_16SrXII-284-09_secY_1_1	ATGAAAAGCAAAATAAAATTAATTTTAGGCAATCCAAAATTGATTTTTCAAATCTTATTTACTTTTTTTATTATTTTTCTTTTTAAGTTAGGTTCTGCTTTGCCTTTGCCTTTTATTCCT		0	120	-	16SrXII-284-09_secY	619943	22.5
619943_24243613_16SrXII-284-09_secY_1_2	TTTTATTCCTAAAGAATTTAAACTTTTAAAAATTTTAGGATTGATAGATGCTGCCCCATCAAAACTTTTTGGTTTAGGCATTTATCCTTATATTACAGCTTCTATTGTAGTTCAATTTTT		110	230	-	16SrXII-284-09_secY	619943	25.83
619943_24243613_16SrXII-284-09_secY_1_3	TTCAATTTTTACAAAAACTTTTACCTATTTGCCGTGAGTGGAAAGAACAAGGCCAAATCGGTAAACGTAAACTTAACCTTTTAACTAGGGCTTTAGCTTTATTATTTGTTTTTGGACAAA		220	340	-	16SrXII-284-09_secY	619943	31.67
619943_24243613_16SrXII-284-09_secY_1_4	TTTGGACAAACTTTTGGAATGATTCAAAAAACAAGTGATTCATTGGCAGTTTGCTTTTTGATCCCTTTAATTGCCGCTGCTGGATGTGCTATTTTAATTTGGTTTGCTGATTTAATCAAC		330	450	-	16SrXII-284-09_secY	619943	34.17
619943_24243613_16SrXII-284-09_secY_1_5	TTTAATCAACTCTCAAGGGATTGGTAATGGAACTTCTATTTTAATTATGGCCTCAATGAGTAATAATTTAATTGACTCTTTAAAAGAAATAAAACAAAATTATTACGACAATTTATTTAC		440	560	-	16SrXII-284-09_secY	619943	24.17
619943_24243613_16SrXII-284-09_secY_1_6	ATTTATTTACCAACAATTTTGACCCAAAATTGCTAACACAATTTATTTTAATTATCTTAGTATTGCTTTTATTTTTAATTGTAACTGTGATTGTCCAAATTACTTCTTTAAAAATACCAG		550	670	-	16SrXII-284-09_secY	619943	22.5
619943_24243613_16SrXII-284-09_secY_1_7	AAAATACCAGTACAATACGCTCGCAATCAAAGTCCATCAAAAAGTAATAGTTATATCCCTTTTAAAATTAACACTGCTGGAGTAATGCCTGTAATTTTGGCAAATGCCTTGATGCAACCT		660	780	-	16SrXII-284-09_secY	619943	35
619943_24243613_16SrXII-284-09_secY_1_8	GATGCAACCTTTCAAAATGTTAATCCCAATAATTAAAAATAATCAAGGTTTTGAGAATTTTGTCAATTATTTAACTAATATTGACATCGTTAATTTTGCTTTGAGCTTGCATATTTTATT		770	890	-	16SrXII-284-09_secY	619943	24.17
619943_24243613_16SrXII-284-09_secY_1_9	ATATTTTATTAATTATTGTTTTTTCTTTTTTCTCTACTTTTATGAATGTTAATCCTGAAGATATTTCCGAGCATTTATCCAAACAAGATGCCTATATTGTTGGTTTTAGACCAGGAGAAC		880	1000	-	16SrXII-284-09_secY	619943	27.5
619943_24243613_16SrXII-284-09_secY_1_10	CCAGGAGAACAAACAACGAAATACTTATCTTCTCTTTTGTTCAAAATCACCGTTATAGGGGCTGTTTTTTTAGTTACACTCGTCACTATGCCTTACTTGATGAATAAAGTTTTTCATTTA		990	1110	-	16SrXII-284-09_secY	619943	33.33
619943_24243613_16SrXII-284-09_secY_1_11	TTTTCATTTAAAACATATGAAATTAGGAGGAACTAGTTTACTAATTATCGTTAGTGTTGCAATTGAAACTATTCAACGAATTATGACTACCGCTAACCAAAAAGAATATGCAAAATTATT		1100	1220	-	16SrXII-284-09_secY	619943	26.67
619943_24243614_16SrXII-284-09_secA_1_1	ATGTTTAATTTTTTAAAAAAAATATTTAATTCTTCTAAATCATCCTTAAGAAAAGCTAGAGTGATAGCCAACAAAGTCCAAAATCTAAGTGAAAAAATGTCTTTATTGCAAGATAGTGAT		0	120	-	16SrXII-284-09_secA	619943	24.17
619943_24243614_16SrXII-284-09_secA_1_2	TTTTGTTATTAAAACTAATGAATTCAAAGAAAGATATCAAAAAGGAGAAAGTTTAAACCAATTATTACCTGAAGCTTATGCTTTAGCTAGGGAAGCTGCTAAAAGAGTAACAGGACTAAC		119	239	-	16SrXII-284-09_secA	619943	30
619943_24243614_16SrXII-284-09_secA_1_3	CACCTTATTATGTCCAAATCTTAGGAGCTATTATTTTACATCAAGGCAATATTGCCGAAATGAAAACTGGGGAAGGTAAAACTTTGACTGCTGTTATGCCTGCTTATCTTAATGCTTTAA		238	358	-	16SrXII-284-09_secA	619943	35
619943_24243614_16SrXII-284-09_secA_1_4	AGTGGAGAACCGGTTCACATTGTAACAGTGAATGAATATTTAGCCAAAAGAGAATTCGAAGGTAATATTGGTGAAGTTTTTCGTTTTTTAGGTCTTTCGGTTGGACTTAACATTAAAGAT		357	477	-	16SrXII-284-09_secA	619943	34.17
619943_24243614_16SrXII-284-09_secA_1_5	TAGTGATAACAAAGAGAAACAAAAAGCTTACTTATGTGACATCCTTTATGCTACTAATTCCGAACTTGGATTTGATTATTTAAGAGACAATATGGAAATTGAAGCTGACAACTTAGTGAT		476	596	-	16SrXII-284-09_secA	619943	30.83
619943_24243614_16SrXII-284-09_secA_1_6	TGAAACGACCTTATAGTTACGCTATCGTCGATGAAGTAGATTCTATTTTAATCGATGAAGCGCGTACACCTTTAATCATTTCTCAAAGCGTAAAAGAAACTAAAAATTTATATAAAGAAG		595	715	-	16SrXII-284-09_secA	619943	31.67
619943_24243614_16SrXII-284-09_secA_1_7	GCTCAGCGTTTTGTAAAAACTCTCAAAAGCCAACATTATTTGGTTGAATTAGAAAGCAAAACAATTGAATTAACTGAAGAAGGTATCAATAAAGCCGAACTTTTTTTTCAAATTGAAAAC		714	834	-	16SrXII-284-09_secA	619943	30
619943_24243614_16SrXII-284-09_secA_1_8	CTTATATAATGTCGAGCATGCCTCACTTCTTCATCATATCAAAAACGCCTTAAAAGCTTTTTTTACGATGCATAAAAATAAAGACTATTTAGTAGATAATAATCAAGTTTTAATTATCGA		833	953	-	16SrXII-284-09_secA	619943	27.5
619943_24243614_16SrXII-284-09_secA_1_9	ATCAATTCACTGGACGAGTTTTAAGAGGACGTCAATTTAGTGATGGTTTGCACCAAGCTTTAGAAGCTAAGGAAGGAGTTTTAATCAAAGAAGAAACTTCTATTGGAGCAACTATCACCT		952	1072	-	16SrXII-284-09_secA	619943	37.5
619943_24243614_16SrXII-284-09_secA_1_10	TACCAAAATTTTTTCCGTCTTTATCGTAAATTATCTGGAATGACAGGAACTGCTAAAACCGAAGAGGATGAATTTAGAGATATTTATAATATGGAAGTCATCGAAATTCCTACTAACGTT		1071	1191	-	16SrXII-284-09_secA	619943	31.67
619943_24243614_16SrXII-284-09_secA_1_11	TCCTATGATTCGGATTGATGAACCAGATTTTATTTTTATTTCAATGAAAGAAAAATATGATGCTTTAATTGAAGAAGTATTAGAAAGACATAAAACAGGACAACCAATCTTAATTGGAGC		1190	1310	-	16SrXII-284-09_secA	619943	28.33
619943_24243614_16SrXII-284-09_secA_1_12	CAACTACGGTTGAAGTTTCTGAAATTATTTCCAAAAAACTTAAAAAACATTTAATCAAACACGAAATCCTTAATGCCAAAAACCATTTTAAAGAAGCTGACATTATCGCCAAAGCTGGAT		1309	1429	-	16SrXII-284-09_secA	619943	30.83
619943_24243614_16SrXII-284-09_secA_1_13	TTAAAAAACTCAGTTACAATAGCTACCAATATGGCAGGAAGAGGAACTGATATTCGCTTAGGTGAAGGCGTTGTTGAATTAGGAGGTTTGGCGGTTTTAGGAACAGAAAGACATGAATCA		1428	1548	-	16SrXII-284-09_secA	619943	39.17
619943_24243614_16SrXII-284-09_secA_1_14	AAGAAGAATTGATAACCAATTAAGAGGACGTGCCGGTCGTCAAGGAGATCCTGGTTATTCTCGCTTTTTTATTTCCAGCGAAGACGAACTAGCTCAAAGATTTGGTGGAAATAGAATAGA		1547	1667	-	16SrXII-284-09_secA	619943	40
619943_24243614_16SrXII-284-09_secA_1_15	AAAAAATTATTTCTTTGTTGCAACAAATTAATACTAATGATAAAAAAACCTCTTCTAAAATGGTAACTAAATTTTTTACCAAAATCCAAAAAAAAGTCGAATCTTCCAATTTTGATTATC		1666	1786	-	16SrXII-284-09_secA	619943	21.67
619943_24243614_16SrXII-284-09_secA_1_16	CGGAAATATCTGTTAAAATACGACGATATTTTACGAATTCAAAGAGAAATTATCTACGGTCAAAGAAAAGACATTCTAAATAGCCTTGAACCAGAAAAAATAGCTTTTAATTTGGTTGAA		1785	1905	-	16SrXII-284-09_secA	619943	29.17
619943_24243614_16SrXII-284-09_secA_1_17	AAAAACTATTAATCAAGCTATGCTTCCTTATTTTTCCAATCAAAAAAACCCTAATCAAGCCGAAGATTTAATTCTTTTTTTAGAGAAAAACTTTTTTGCAAAAAATACTTTTGATTTAAA		1904	2024	-	16SrXII-284-09_secA	619943	23.33
619943_24243614_16SrXII-284-09_secA_1_18	AAGAAATACAAGCGATATTTAATAATTCTAAAAATAAAAGTTTAGTTGAATTTAAAAAACACTTATTAGATAAAATTACTGTTATTTTTGAAAACCAAAAAGCTGTTTTCGCAAAAGAAG		2023	2143	-	16SrXII-284-09_secA	619943	20.83
619943_24243614_16SrXII-284-09_secA_1_19	GAGGAACAAAATCAATATTTTGCTCAAGCTCTAAGATGGATTATGTTAAAAATAATCGATACTCATTATAAACGTCATATTAATGATATGAGTATTTTAAGGCAAGGAATTGGCTTTGTT		2142	2262	-	16SrXII-284-09_secA	619943	28.33
619943_24243614_16SrXII-284-09_secA_1_20	TAGTTACGGACAACAAGATTCTTTCATTGAGTACCAAAAAGAAGGACAAATCTTTTTCAATAAAATGATTCATCAAATAGCTACAGATATCACTACTACGGTTTTAAAATTTTCTTTTGA		2261	2381	-	16SrXII-284-09_secA	619943	28.33
619943_24243614_16SrXII-284-09_secA_1_21	AGCAAAGTTTCCAAAAAATGCCAAAAGAACAAAAAATAATTTTAAATGATAGCAGTTCAGACAAAAATATCACCAAAAAAAGAAGAAAAGTGCGCGTTACTAAAAAACCTTGGAATTAA		2380	2499	-	16SrXII-284-09_secA	619943	27.73
619943_24243615_16SrXII-284-09_NusA_1_1	TTGATTAGTAAGAATTTTTTTAAACTATTAGATAAGATAGTACAAGAAAGAGATTTGCCGCGCAAAGAAGTGATTGAAGCATTTGGCAAAGGATTAATCGCCGGTTGTAAAAAAAATCAT		0	120	-	16SrXII-284-09_NusA	619943	30.83
619943_24243615_16SrXII-284-09_NusA_1_2	TCAAGTAAAAAGTTGCCGTGTTCAAATGAGAGAAAATAAAAGCGAAATTCTTCTATATAAACAATTTATAGTTGCTGATAAAACCAACATTGGCATGATTAATTTAAAAGAATTAACCCC		119	239	-	16SrXII-284-09_NusA	619943	28.33
619943_24243615_16SrXII-284-09_NusA_1_3	CGATTGATTTATCAGAGGCACAAACTATTAAACCACAAGCAAAAGTAGGACAAATTATCGAAATTAAAGTCGATCCAAAAGAATTTAATTTATACGCCATCAAAGAATTTAAAAACCAGT		238	358	-	16SrXII-284-09_NusA	619943	30
619943_24243615_16SrXII-284-09_NusA_1_4	TTTAATGAAGAATTAACCAAAAGGAAAAGAGAAAACATTTATCATTTTTTTAAAGAACAAGAAGGTAAATTGATTAGTGCTAAAGTTATTTCAGAAAACGAAAGATTTTATAACCTTGAA		357	477	-	16SrXII-284-09_NusA	619943	23.33
619943_24243615_16SrXII-284-09_NusA_1_5	ATTAGAAAAAGAGATTACTACTTTATTACCCAAAAAAGAAATTTCTGACAACAATGTACCACATATAGGCGAAAGAATTCAAGTTTTTTTATCAGAAGTTAGAAAAACTAATAAATGGCC		476	596	-	16SrXII-284-09_NusA	619943	27.5
619943_24243615_16SrXII-284-09_NusA_1_6	CTAAAATTTTTGTTAGTTATAATCATGTCGGACTTGTGGTGAAAGTCTTTGAAGAAAACATCCCCGAAATCCAAGAAGGGATTGTAAAAATTATGGCAATTGCCCGCATTTCGGGCGAAA		595	715	-	16SrXII-284-09_NusA	619943	37.5
619943_24243615_16SrXII-284-09_NusA_1_7	AGAACTAAAATTGGCTTAAATTCACAAGATCCTCAAGTTGATGCAATCGGCTCTTGCATTGGTGCAAACAGTAGTCGGATTAAATATATTATCAAAATTTTAAAAGGCGAAAAAATTGAT		714	834	-	16SrXII-284-09_NusA	619943	31.67
619943_24243615_16SrXII-284-09_NusA_1_8	TTTGTTTAATTGGAGCGAAGACCAAAAAGAATTAATTAGTAACGCCCTAAGACCGGCTCAATGTGTTAATGTGATTATCAAAAACGAAGTTAATAAATATGCTGTAGCAATTATTCCAGA		833	953	-	16SrXII-284-09_NusA	619943	32.5
619943_24243615_16SrXII-284-09_NusA_1_9	ATGATCAATTTTCTTTGGCAATCGGAAAATTAGGCAAAAACGTAAAATTAGCCGTAGAAGTGACTAAATGGAATATTGATATCAAAACTTTATCTCAAGCAAAGGAAGAAGGAATCATAT		952	1072	-	16SrXII-284-09_NusA	619943	30.83
619943_24243616_16SrXII-284-09_rp_1_1	AAACTTGGTCACGTAGTTCCACAATTACTCCTGTCTTTGTAGGTCACAAAATCGCTGTTTATAATGGACGCGAACATATTCCTGTCTACATTACAGAAAACATGGTCGGTCATAAATTAG		0	120	-	16SrXII-284-09_rp	619943	38.33
619943_24243616_16SrXII-284-09_rp_1_2	AAATTAGGAGAGTTTTCTCCTACCCGCACTTATCGTGGACATAACAAAAAAGACAAAAAAATTCAAAAAAAATAAAATAATGGGAAGGAATGACTATGGAAACTAAAAACGCTAAAGCGA		113	233	-	16SrXII-284-09_rp	619943	31.67
619943_24243616_16SrXII-284-09_rp_1_3	AAAGCGATTGTTCGTAAAGTTTCAATCGCCCCACGAAAATCCCGTTTAGTGATTGACTTAATTAGAGGAAAAAATATCGATCAAGCTCAAGCCATTTTAACTTTTACTCCTAAAGTAGCT		226	346	-	16SrXII-284-09_rp	619943	35.83
619943_24243616_16SrXII-284-09_rp_1_4	AGTAGCTGCTCCCGTTATTTTAAAACTTTTAAATAGTGCTGTTGCAAATGCTTTAAATAATTTAAAATTACAACGTGAACAACTTTTTGTCAAAGAAGTTTTTGTCAACGAAGGCATACG		339	459	-	16SrXII-284-09_rp	619943	30.83
619943_24243616_16SrXII-284-09_rp_1_5	GCATACGTTTAAAGCGTATGTTTCCGAGAGCTAAAGGGTCTGGTGATATGATTAAAAAAAGAACTAGTCACATCACTTTAGTAGTGGCTGCTAAAAACTTGCAAACATCAAAGGAGGCGA		452	572	-	16SrXII-284-09_rp	619943	39.17
619943_24243616_16SrXII-284-09_rp_1_6	GAGGCGAACAGTGGGTCAAAAAACTAATCCTAATGGTTTAAGATTAGGTATTATTAGAACTTGGGATTCTCAATGGTGTGTCAATGACAAAGAAATACCAGCTTTAATTAAAGAAGAATT		565	685	-	16SrXII-284-09_rp	619943	33.33
619943_24243616_16SrXII-284-09_rp_1_7	AAGAATTTTTAATTCGCAAAATAATTAATCAATTTGGTAAAAAAAGCGCTATTAGTCAAATTGAAATACAGCGTTTAAAAGAAAAAACCAAAAATCGGATCACAATTTCAATTCATACCG		678	798	-	16SrXII-284-09_rp	619943	25.83
619943_24243616_16SrXII-284-09_rp_1_8	CATACCGCCAAACCAGGAATGATTATCGGTAAGGAGGGTGAAACTCGCAATAAAATAGTAGCGCAATTAAAAACATTAACTGGCAAAGACATTAACTTAAATATTATAGAAGTTAAAATC		791	911	-	16SrXII-284-09_rp	619943	33.33
619943_24243616_16SrXII-284-09_rp_1_9	TAAAATCCCAGATAAAATAGCTTTATTAGTAGCACAAAATATTGCTGAACAATTAGAAAACCGAATGAAATTTCGTCGTGTTCAAAAAATGGCGATCCAAAGAGCCCTTAAATCTGGCGC		904	1024	-	16SrXII-284-09_rp	619943	35
619943_24243616_16SrXII-284-09_rp_1_10	CTGGCGCTAAAGGGATTAAAATTTTAATTTCTGGTCGTCTTAATGGCAATGAAATAGCGCGTAGCGAAGGCAATGCTGAAGGTCGTGTTCCTTTGCACACTTTAAGAGCAGATATTGATT		1017	1137	-	16SrXII-284-09_rp	619943	40.83
619943_24243616_16SrXII-284-09_rp_1_11	ATTGATTATGCTGCCTACGAAGCACACACCACTTATGGTGTTTTAGGGATCAAAGTCTGGATTTTTCACGGTGAAGTTTTATCCGGTCAAACCATCCTAGACACTCGTAAACCTTTTGTT		1130	1250	-	16SrXII-284-09_rp	619943	40.83
